# Supplementary material for: Youssoufenes A2 and A3, Antibiotic Dimeric Cinnamoyl Lipids from the ΔdtlA Mutant of a Marine-Derived Streptomyces Strain
Source: MDPI journal article supplement (doi:10.3390/md20060394), 2022-06-14
Supplement: s1 [file s1]

# Supporting Information

## **Youssoufenes A2 and A3, Antibiotic Dimeric Cinnamoyl Lipids from the *AdtIA* Mutant of a Marine-Derived *Streptomyces* Strain**

Jing Liu<sup>1,†</sup>, Huayue Li<sup>1,2,\*,†</sup>, Zengzhi Liu<sup>1</sup>, Tong Li<sup>1</sup>, Zirong Deng<sup>1</sup>, Fei Xiao<sup>1</sup>, Wenli Li<sup>1,2,\*</sup>

<sup>1</sup>Key Laboratory of Marine Drugs, Ministry of Education, School of Medicine and Pharmacy, Ocean University of China, Qingdao 266003, China

<sup>2</sup>Laboratory for Marine Drugs and Bioproducts of Qingdao National Laboratory for Marine Science and Technology, Qingdao 266237, China

## Table of contents

Figure S1. HPLC-HRESIMS of the culture extract of the *ΔdtlA* mutant strain of marine-derived *S. youssoufiensis* OUC6819

Figure S2. UV spectrum of compounds **1** and **2**

Figure S3. ECD spectrum of compound **1**

Figure S4. IR (KBr) spectrum of compound **1**

Figure S5. HRESIMS spectrum of compound **1**

Figure S6. <sup>1</sup>H NMR spectrum of compound **1** in CD<sub>3</sub>OD (600 MHz)

Figure S7. <sup>13</sup>C NMR spectrum of compound **1** in CD<sub>3</sub>OD (150 MHz)

Figure S8. COSY spectrum of compound **1** in CD<sub>3</sub>OD (600 MHz)

Figure S9. HSQC spectrum of compound **1** in CD<sub>3</sub>OD (600 MHz)

Figure S10. HMBC spectrum of compound **1** in CD<sub>3</sub>OD (600 MHz)

Figure S11. NOESY spectrum of compound **1** in CD<sub>3</sub>OD (600 MHz)

Figure S12. <sup>1</sup>H NMR spectrum of compound **1** in DMSO-*d*<sub>6</sub> (600 MHz)

Figure S13. COSY spectrum of compound **1** in DMSO-*d*<sub>6</sub> (600 MHz)

Figure S14. HSQC spectrum of compound **1** in DMSO-*d*<sub>6</sub> (600 MHz)

Figure S15. HMBC spectrum of compound **1** in DMSO-*d*<sub>6</sub> 600 MHz)

Figure S16. NOESY spectrum of compound **1** in DMSO-*d*<sub>6</sub> (600 MHz)

Figure S17. ECD spectrum of compound **2**

Figure S18. IR (KBr) spectrum of compound **2**

Figure S19. HRESIMS spectrum of compound **2**

Figure S20. <sup>1</sup>H NMR spectrum of compound **2** in CD<sub>3</sub>OD (600 MHz)

Figure S21. <sup>13</sup>C NMR spectrum of compound **2** in CD<sub>3</sub>OD (150 MHz)

Figure S22. COSY spectrum of compound **2** in CD<sub>3</sub>OD (600 MHz)

Figure S23. HSQC spectrum of compound **2** in CD<sub>3</sub>OD (600 MHz)

Figure S24. HMBC spectrum of compound **2** in CD<sub>3</sub>OD (600 MHz)

Figure S25. NOESY spectrum of compound **2** in CD<sub>3</sub>OD (600 MHz)

Table S1. <sup>1</sup>H (600 MHz) and <sup>13</sup>C (150 MHz) NMR data of compound **1** in DMSO-*d*<sub>6</sub>

Table S2. Antibacterial activity of compounds **1** and **2** against multi-drug resistant *Enterococcus faecalis* CCARM 5172

Table S3. Bacteria and plasmids used in this study

Table S4. The computational method and coordinates of (3*R*,9'*R*,11'*S*)-**1** for ECD calculation

Table S5. The computational method and coordinates of (3*S*,9'*S*,11'*R*)-**1** for ECD calculation

Table S6. The computational method and coordinates of (5*R*,7'*R*,9'*S*)-**2** for ECD calculation

Table S7. The computational method and coordinates of (5*S*,7'*S*,9'*R*)-**2** for ECD calculation

References

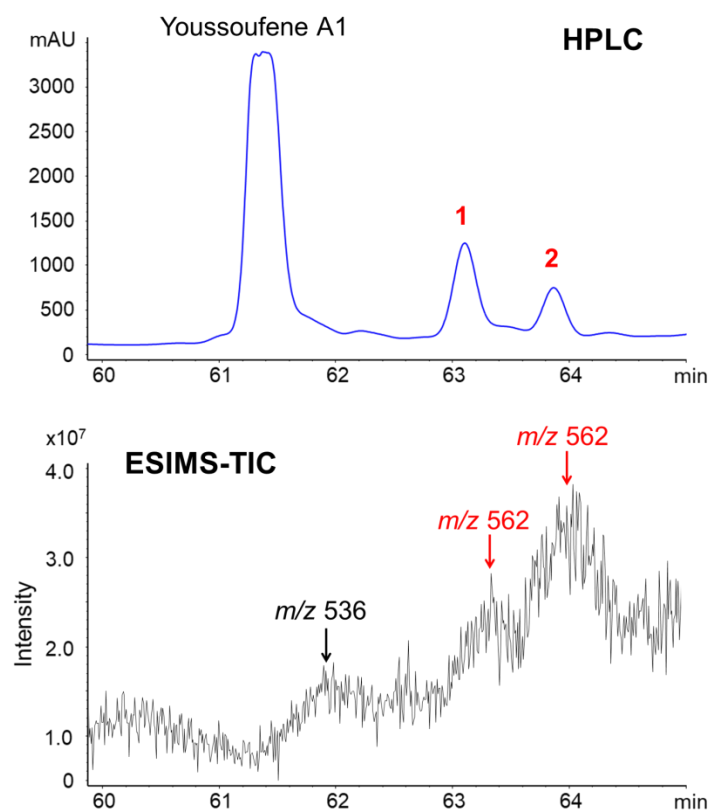

**Figure S1.** HPLC-HRESIMS of the culture extract of the *ΔdtlA* mutant strain of marine-derived *S. youssoufiensis* OUC6819. HPLC conditions: Agilent Eclipse Plus C18 (100 × 2.1 mm, 3.5  $\mu$ m); 20-100% gradient ACN/H<sub>2</sub>O; wavelength 300 nm.

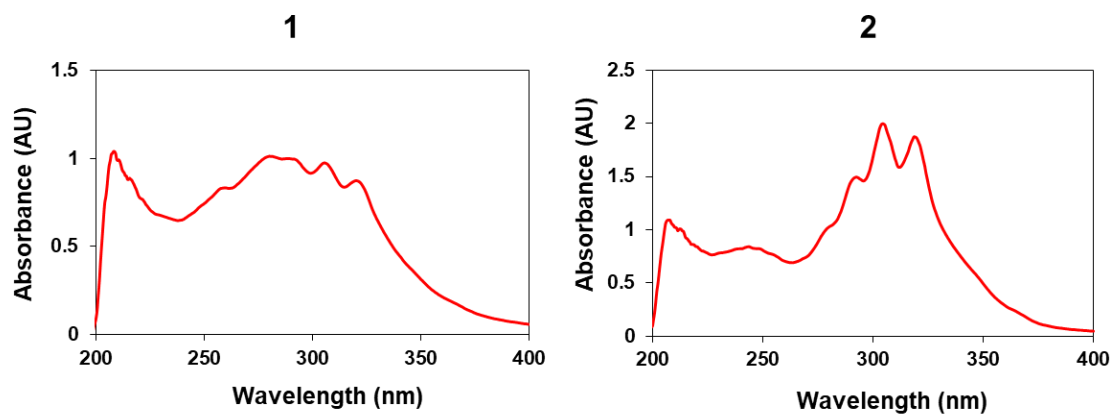

**Figure S2.** UV spectra of compounds 1 and 2.

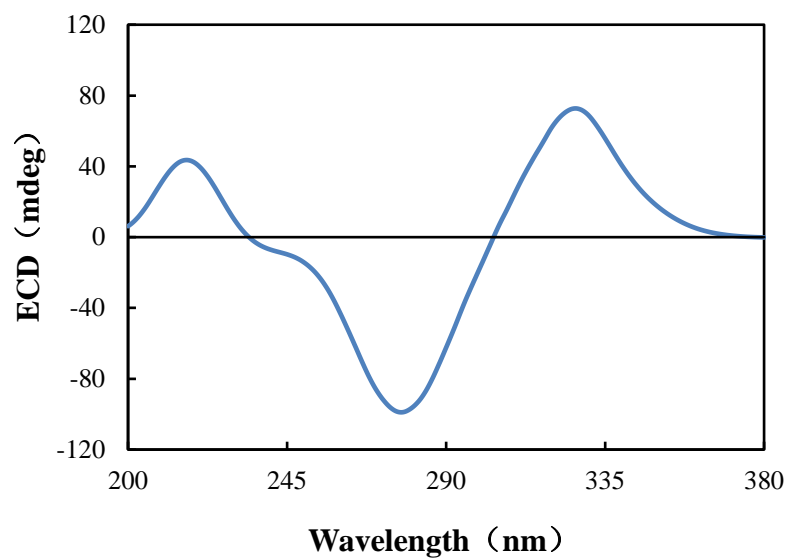

**Figure S3.** ECD spectrum of compound **1**

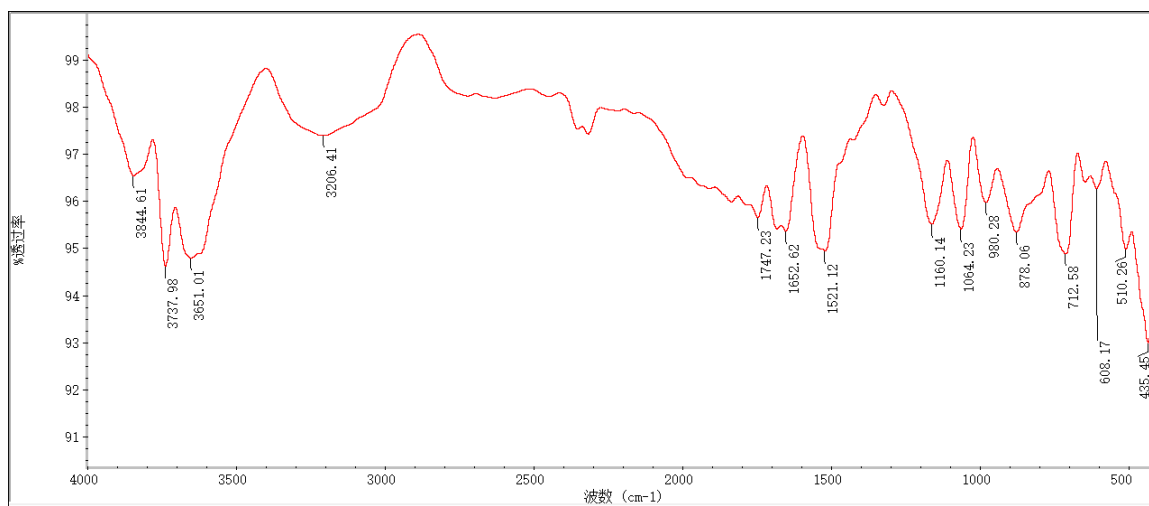

**Figure S4.** IR (KBr) spectrum of compound **1**

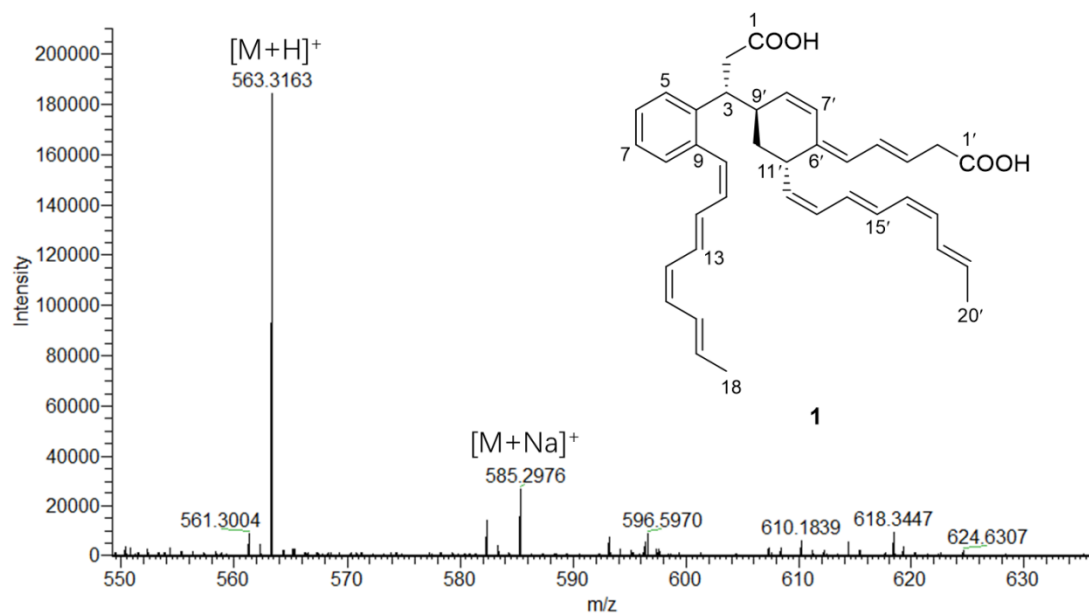

Figure S5. HR-ESIMS spectrum of compound **1**.

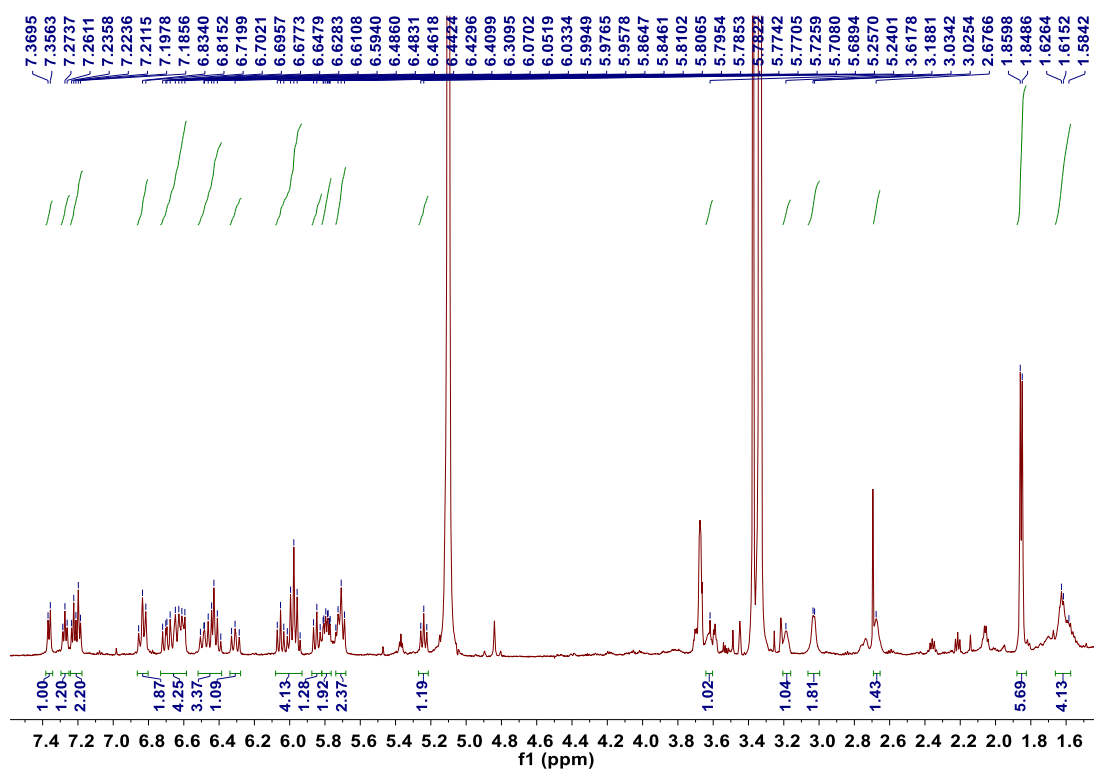

Figure S6.  $^1\text{H}$  NMR spectrum of compound **1** in  $\text{CD}_3\text{OD}$  (600 MHz).

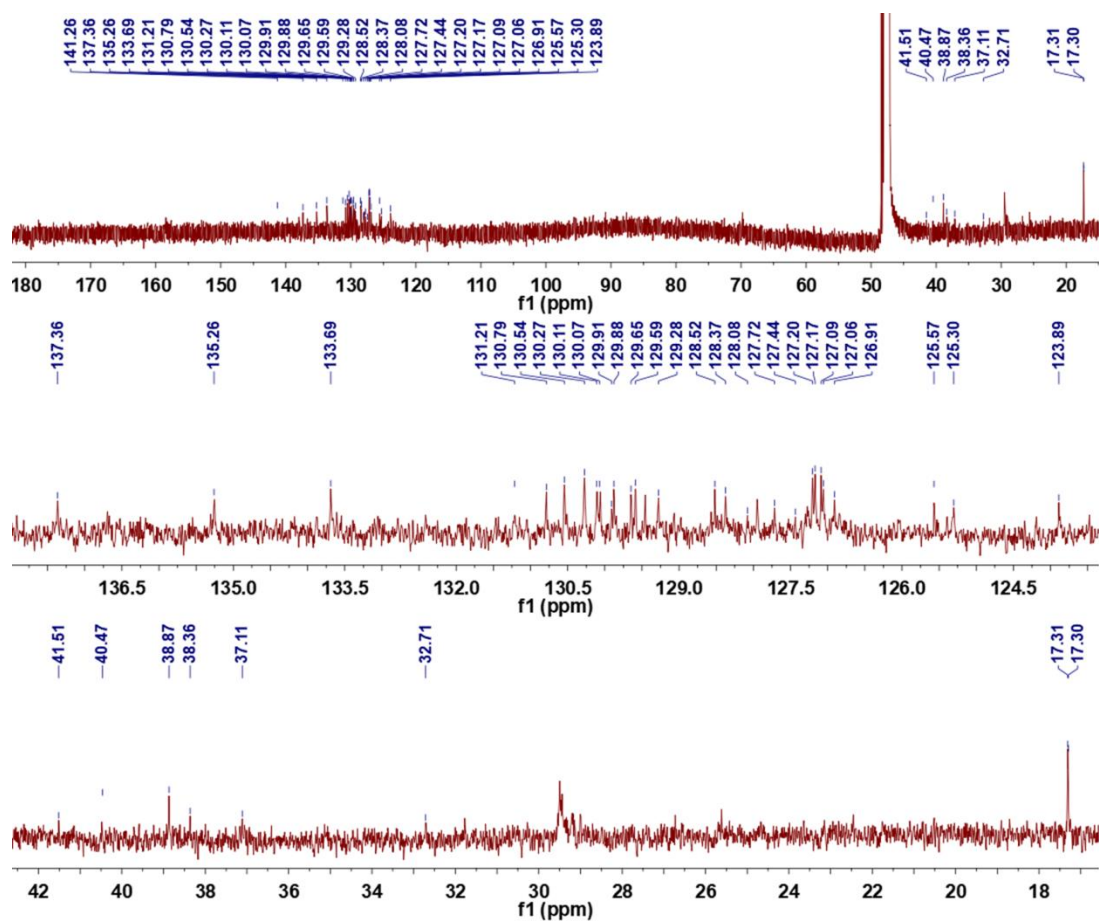

Figure S7.  $^{13}\text{C}$  NMR spectrum of compound **1** in  $\text{CD}_3\text{OD}$  (150 MHz).

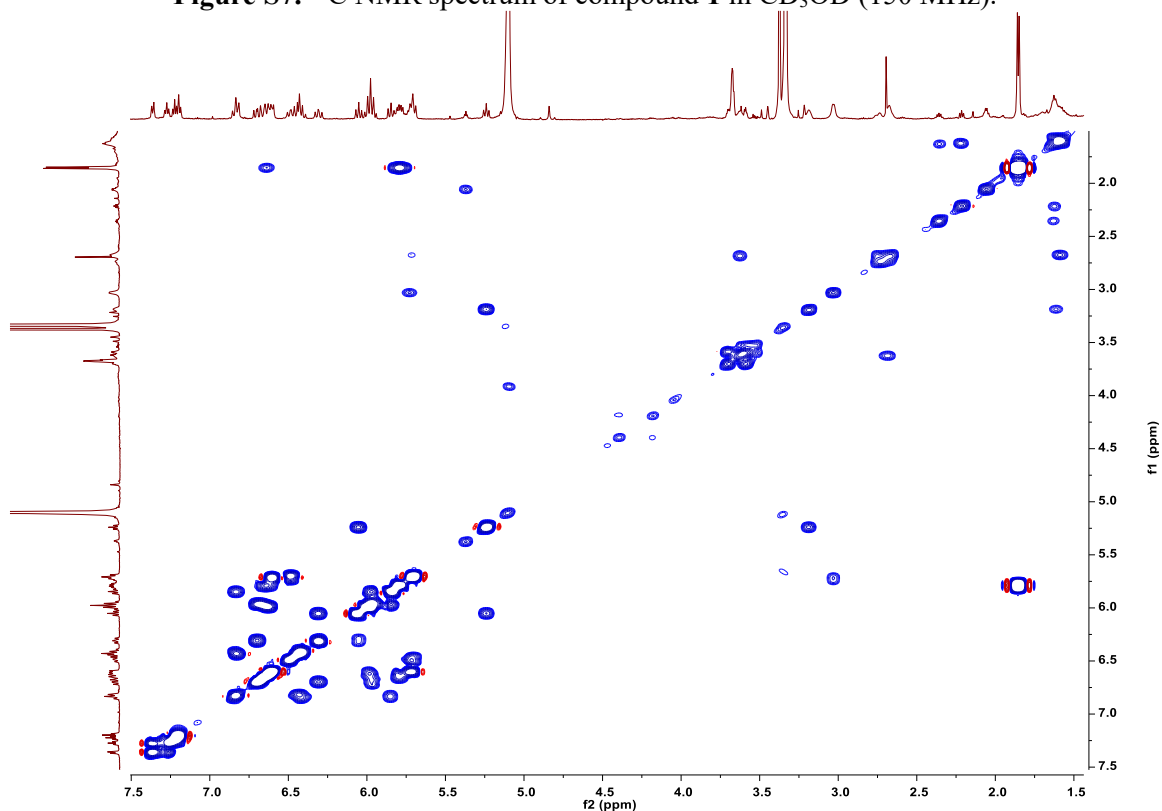

Figure S8. COSY spectrum of compound **1** in  $\text{CD}_3\text{OD}$  (600 MHz).

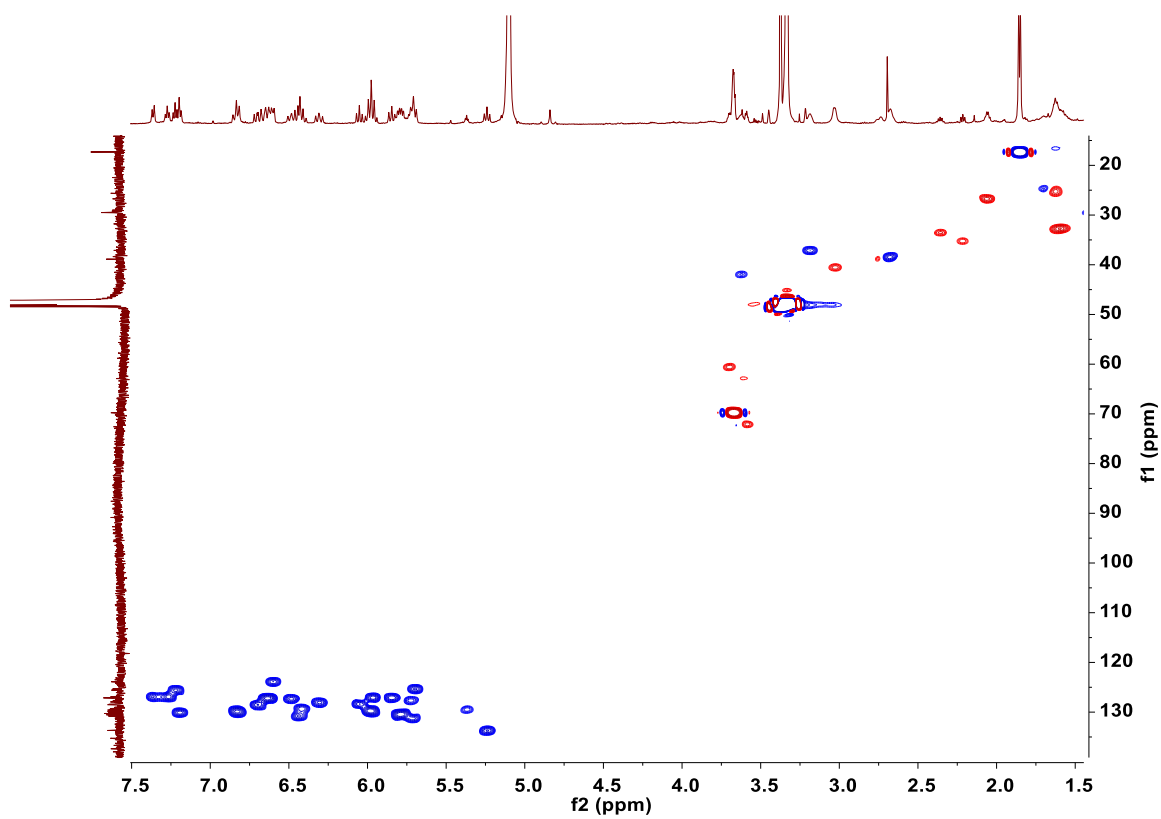

Figure S9. HSQC spectrum of compound **1** in CD<sub>3</sub>OD (600 MHz).

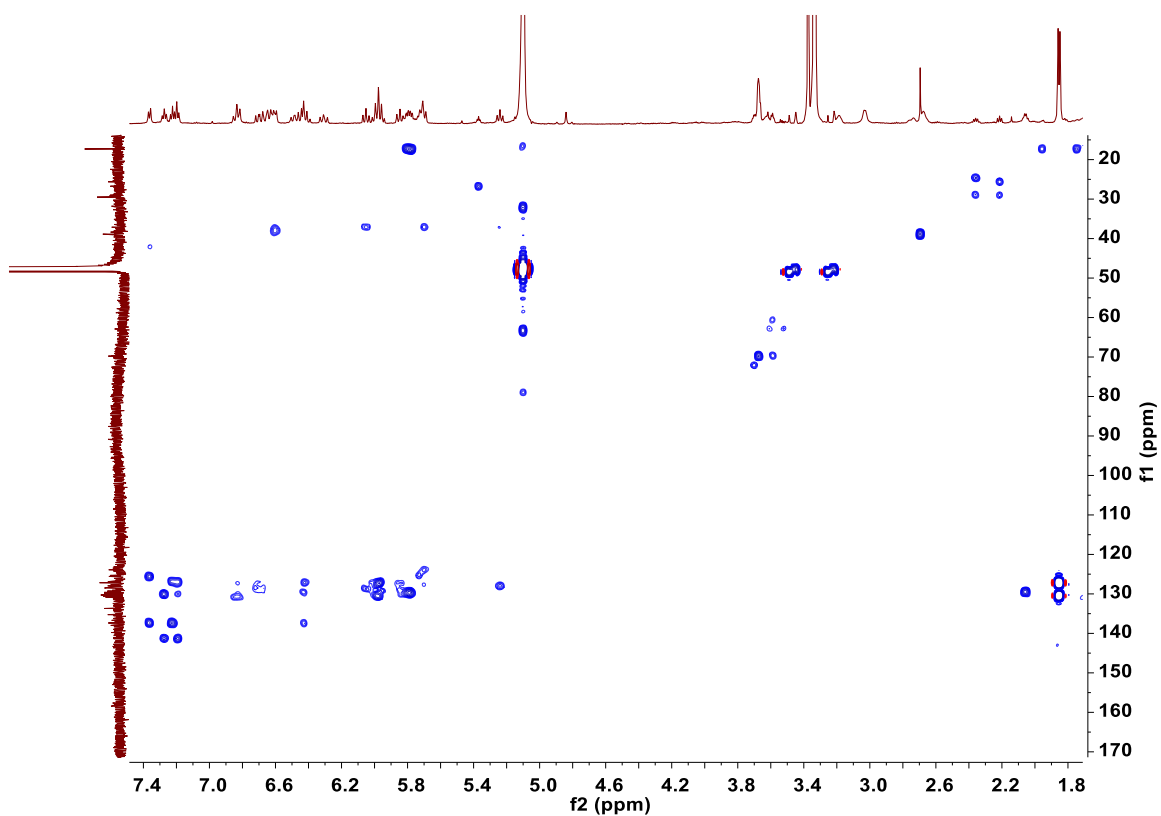

Figure S10. HMBC spectrum of compound **1** in CD<sub>3</sub>OD (600 MHz).

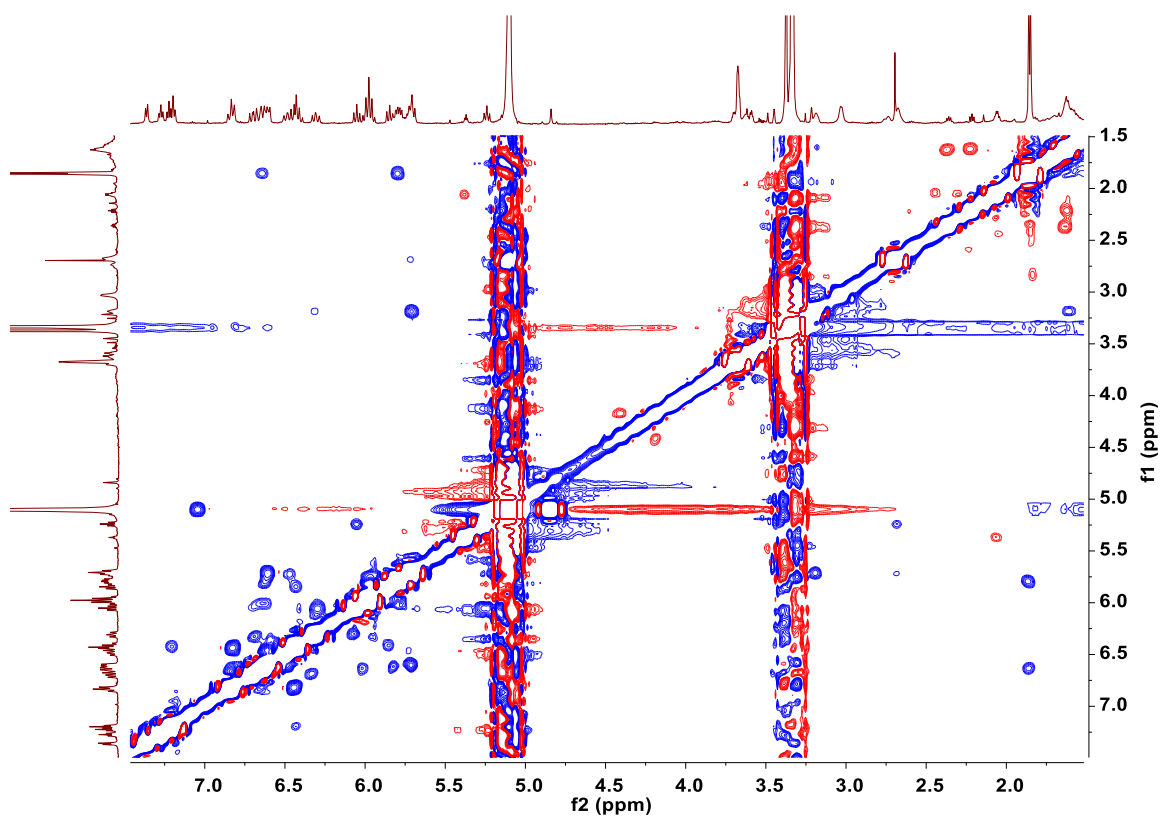

Figure S11. NOESY spectrum of compound **1** in CD<sub>3</sub>OD (600 MHz)

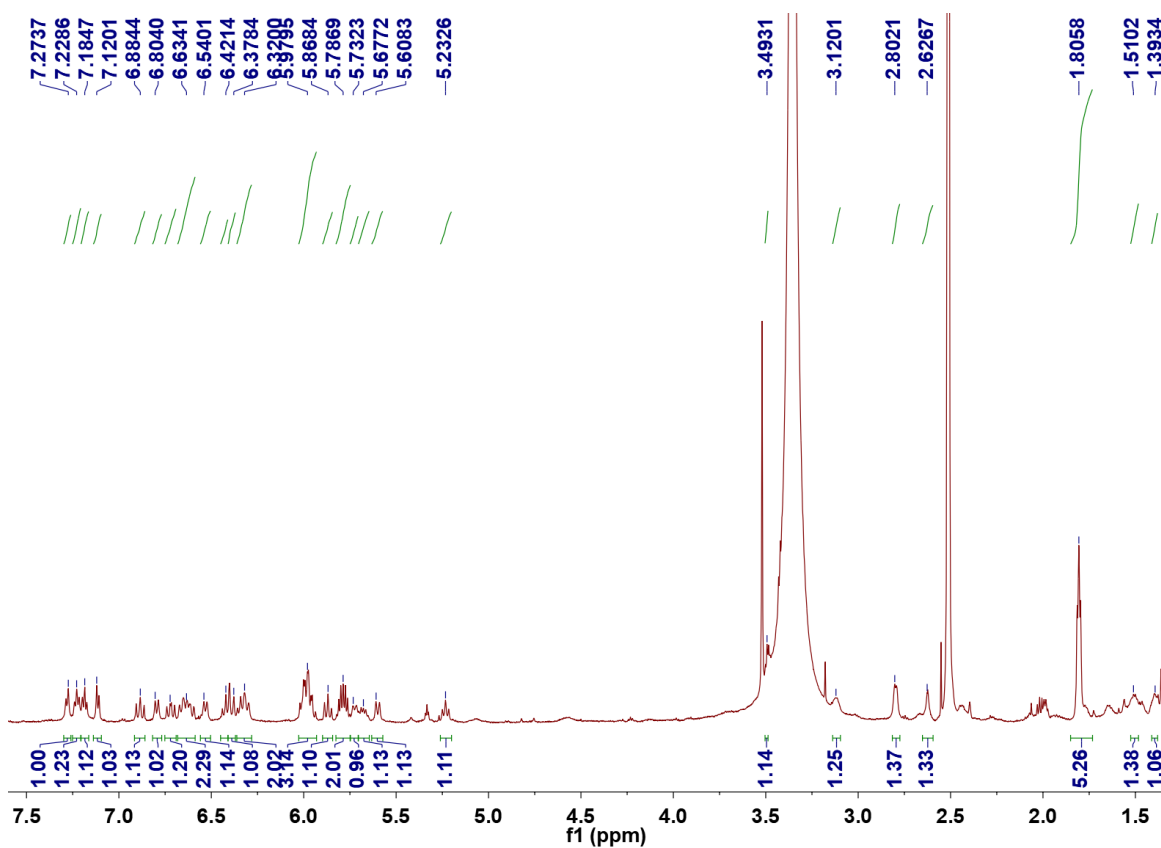

Figure S12. <sup>1</sup>H NMR spectrum of compound **1** in DMSO-*d*<sub>6</sub> (600 MHz).



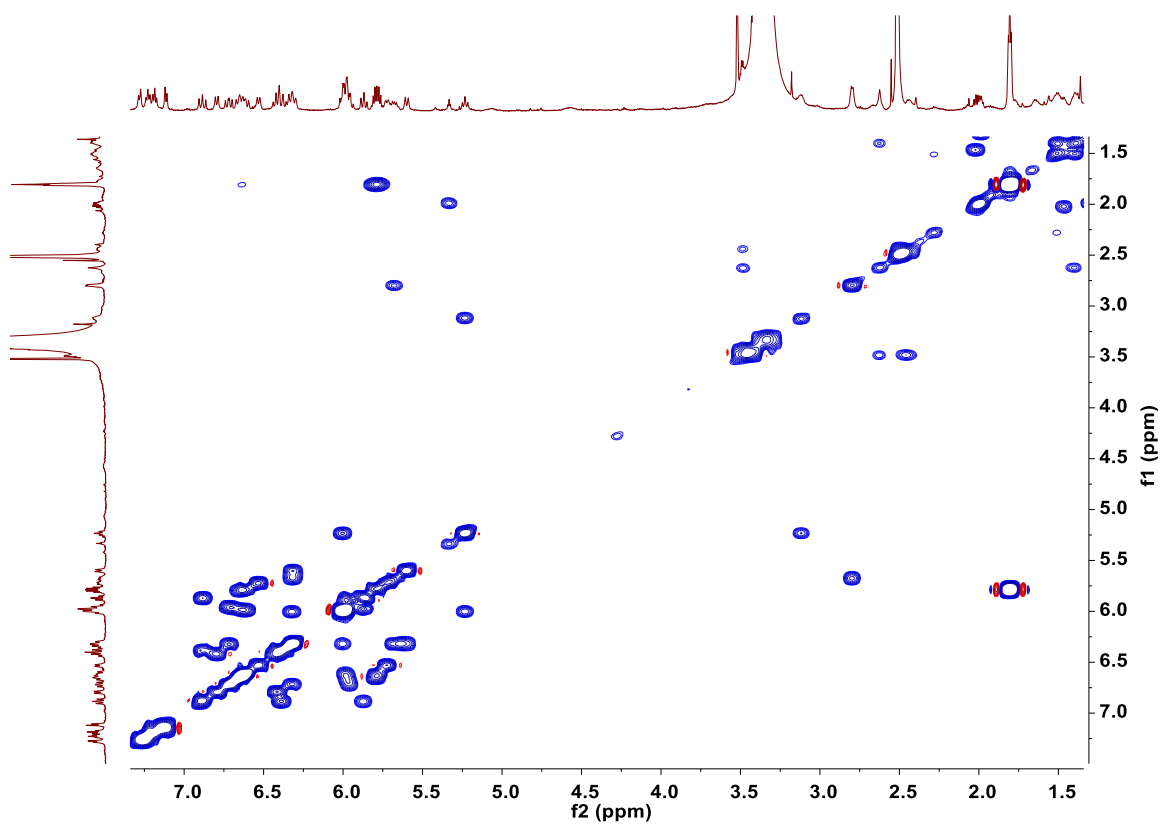

**Figure S13.** COSY spectrum of compound **1** in DMSO-*d*<sub>6</sub> (600 MHz).

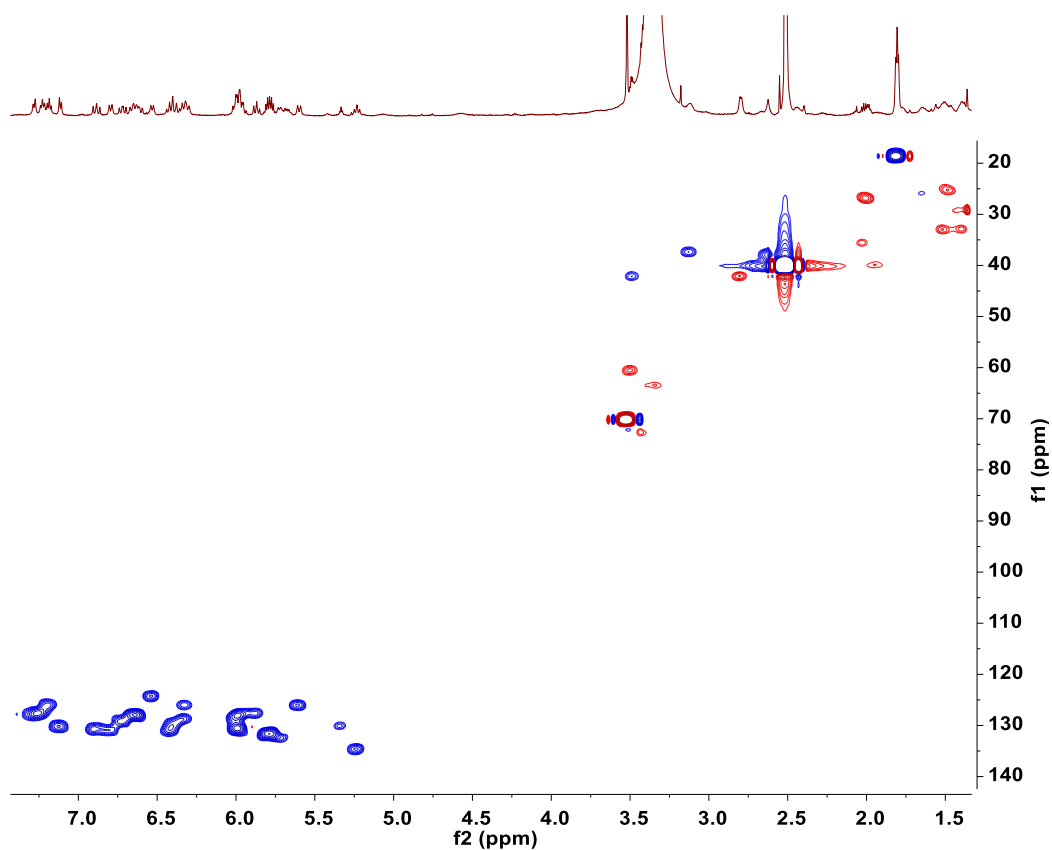

**Figure S14.** HSQC spectrum of compound **1** in DMSO-*d*<sub>6</sub> (600 MHz).

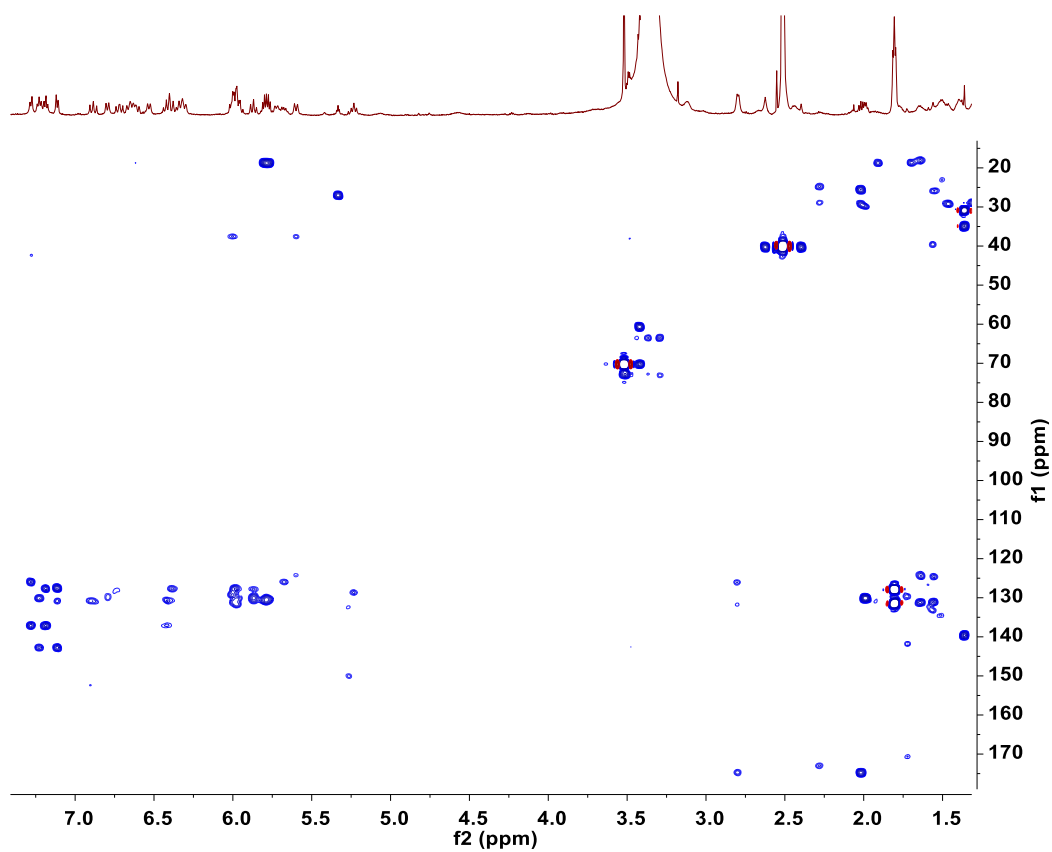

**Figure S15.** HMBC spectrum of compound **1** in DMSO- $d_6$  (600 MHz).

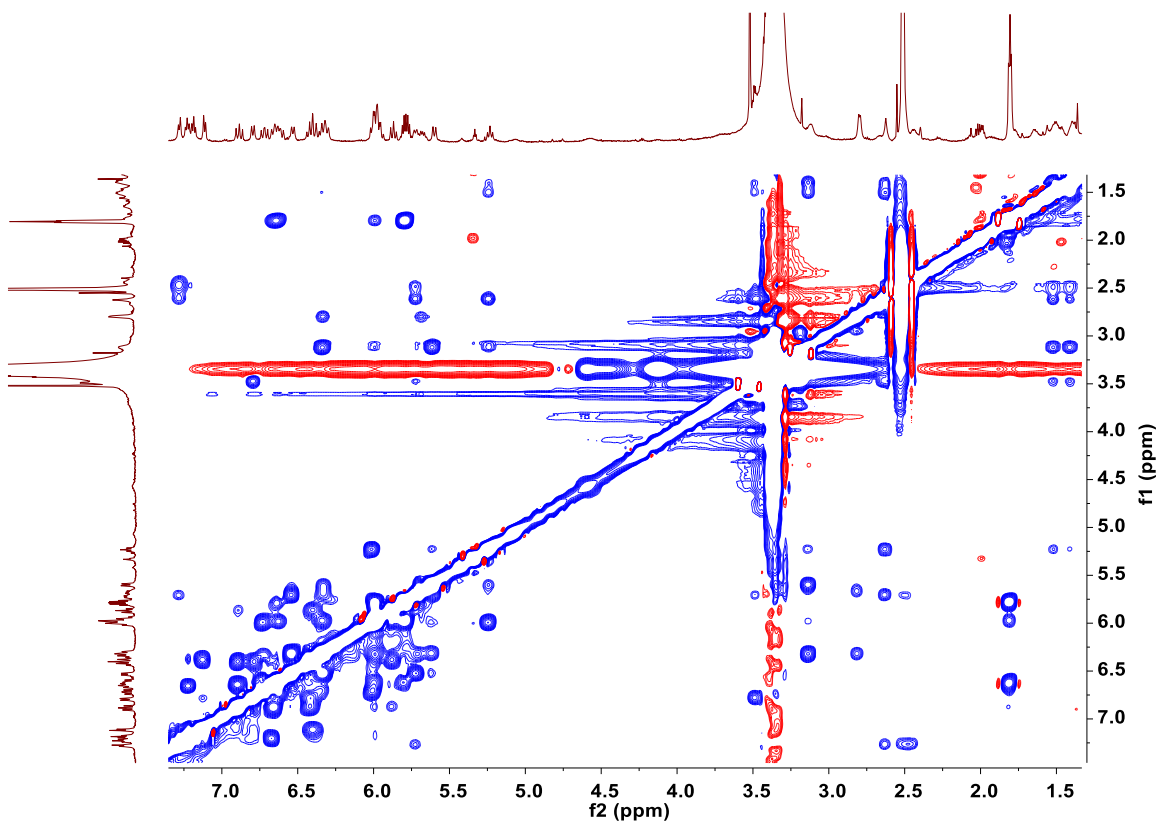

**Figure S16.** NOESY spectrum of compound **1** in DMSO- $d_6$  (600 MHz)

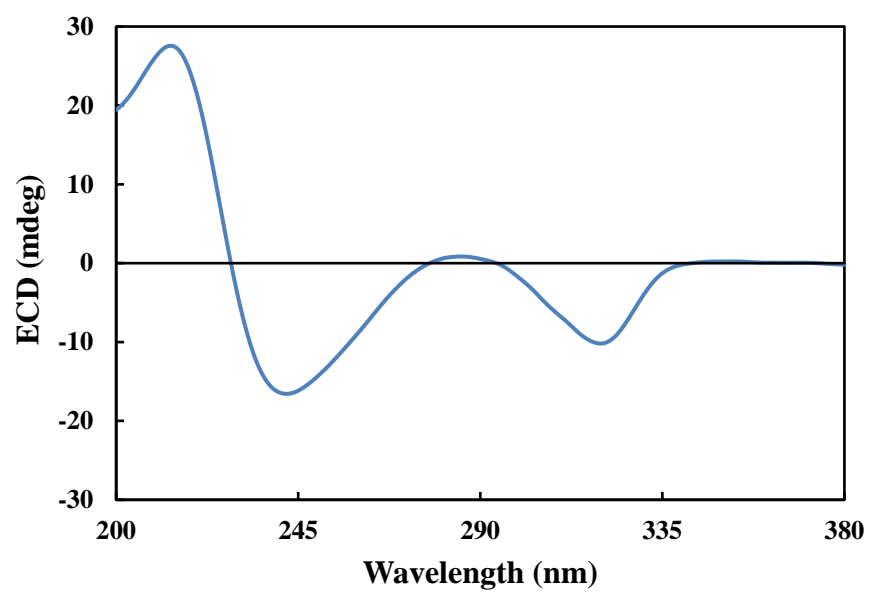

Figure S17. ECD spectrum of compound 2

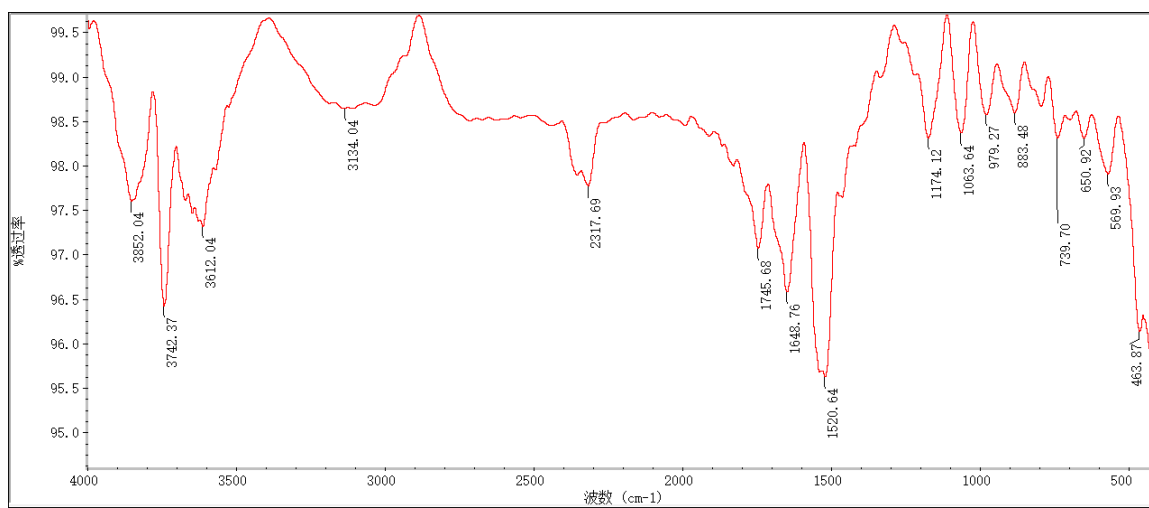

Figure S18. IR (KBr) spectrum of compound 2

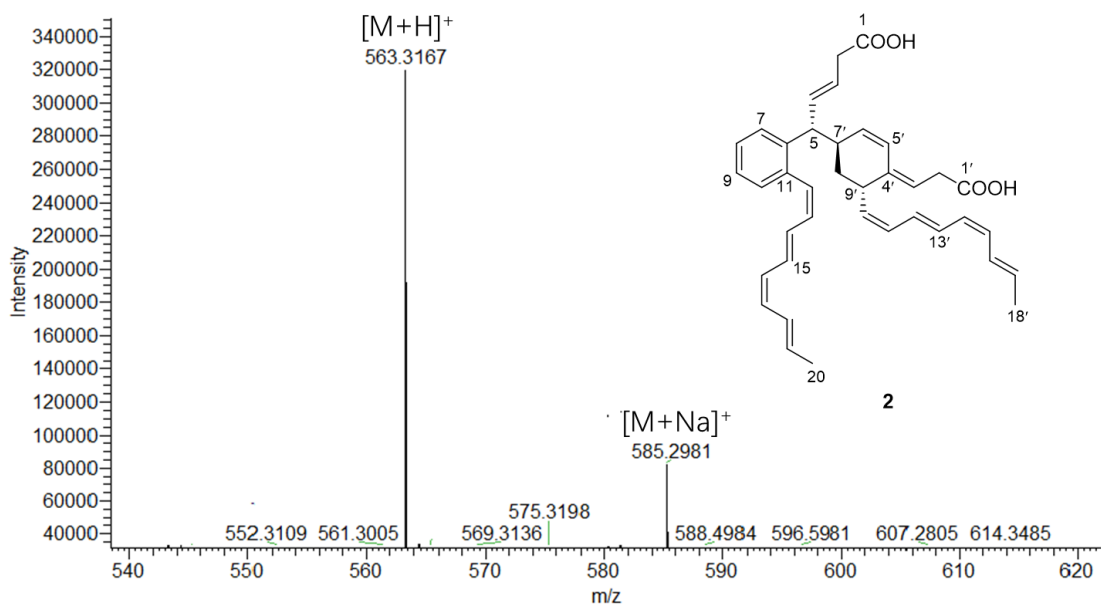

**Figure S19.** HR-ESIMS spectrum of compound **2**

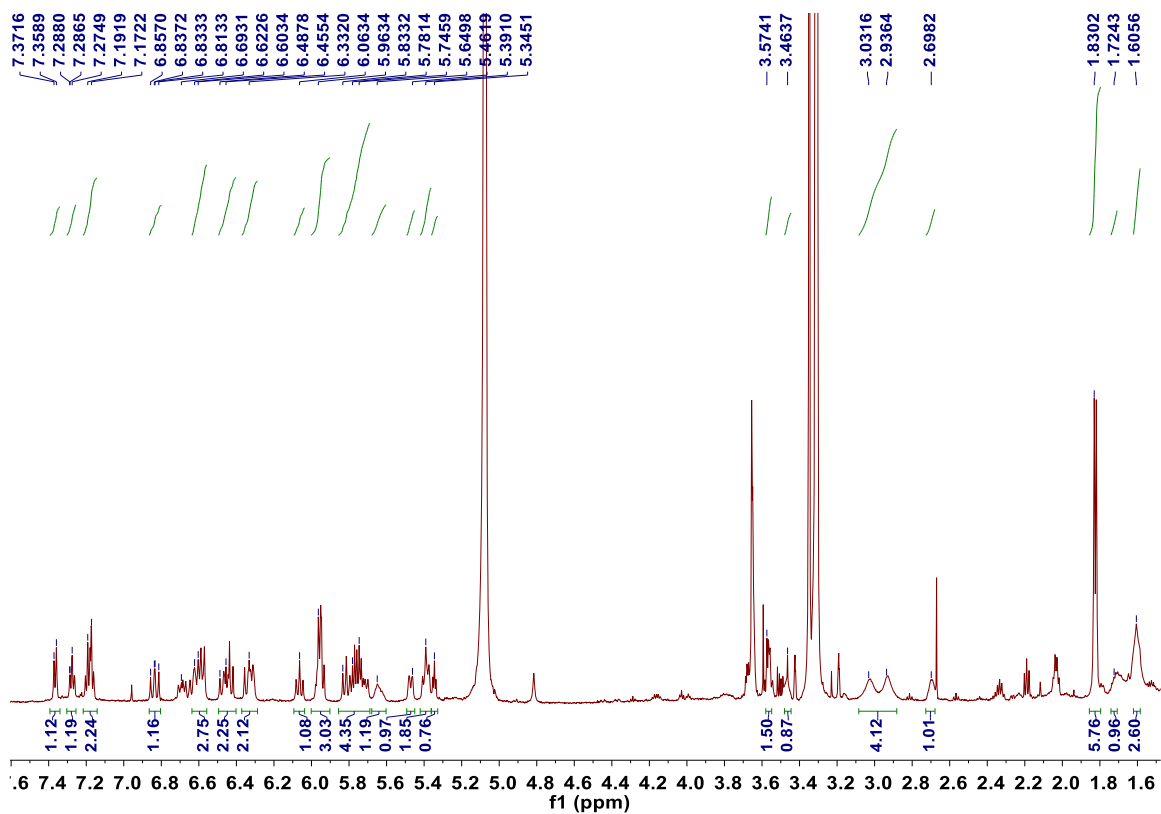

**Figure S20.**  $^1\text{H}$  NMR spectrum of compound **2** in  $\text{CD}_3\text{OD}$  (600 MHz)

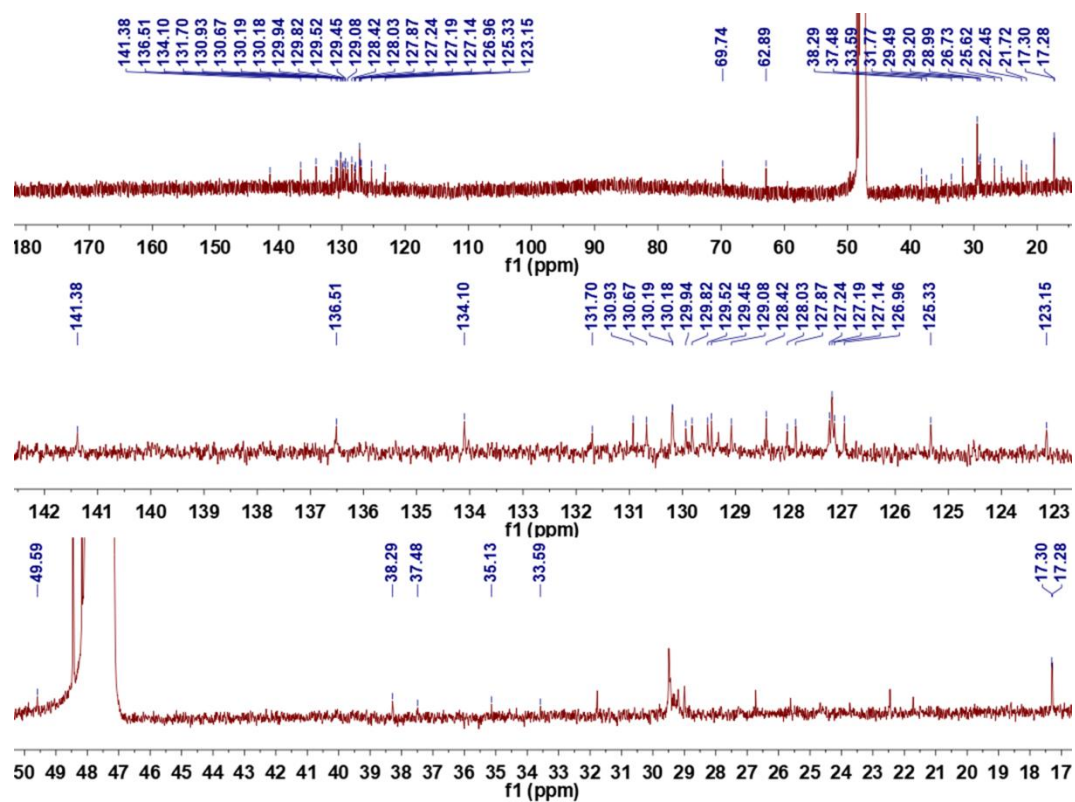

Figure S21.  $^{13}\text{C}$  NMR spectrum of compound **2** in  $\text{CD}_3\text{OD}$  (150 MHz)

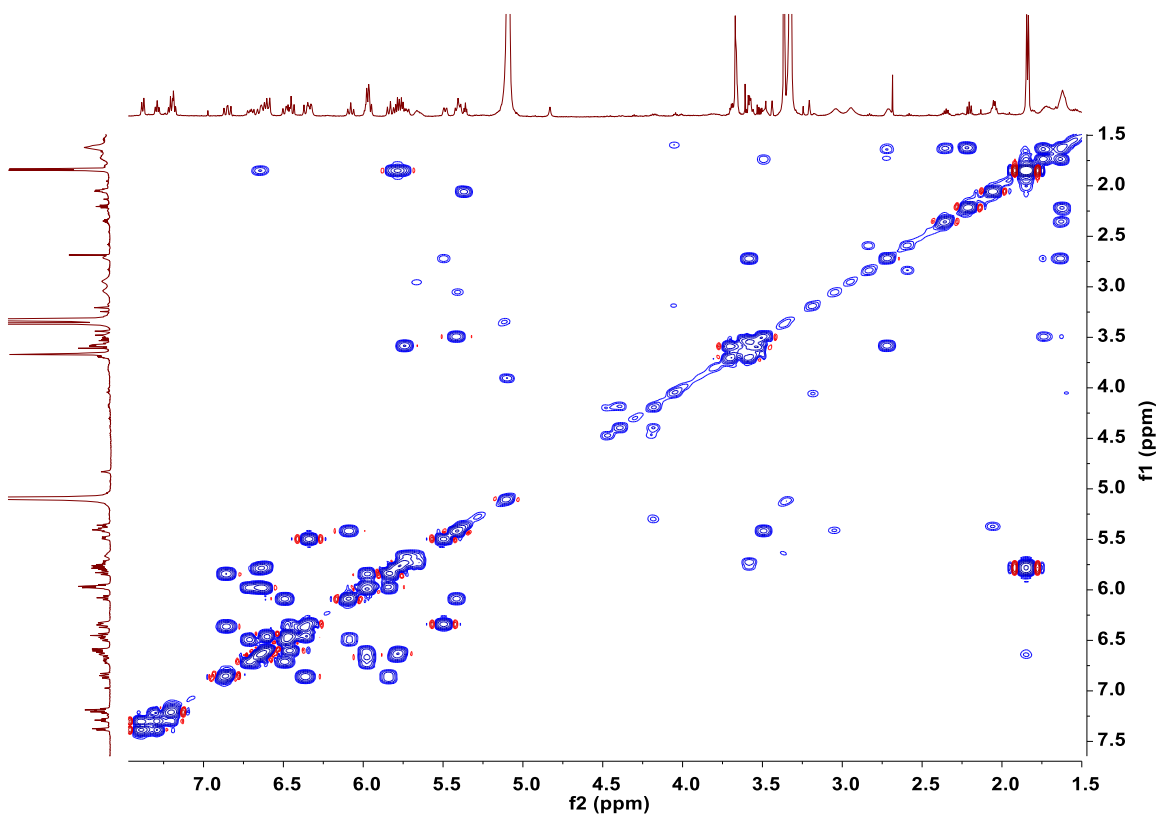

Figure S22. COSY spectrum of compound **2** in  $\text{CD}_3\text{OD}$  (600 MHz)

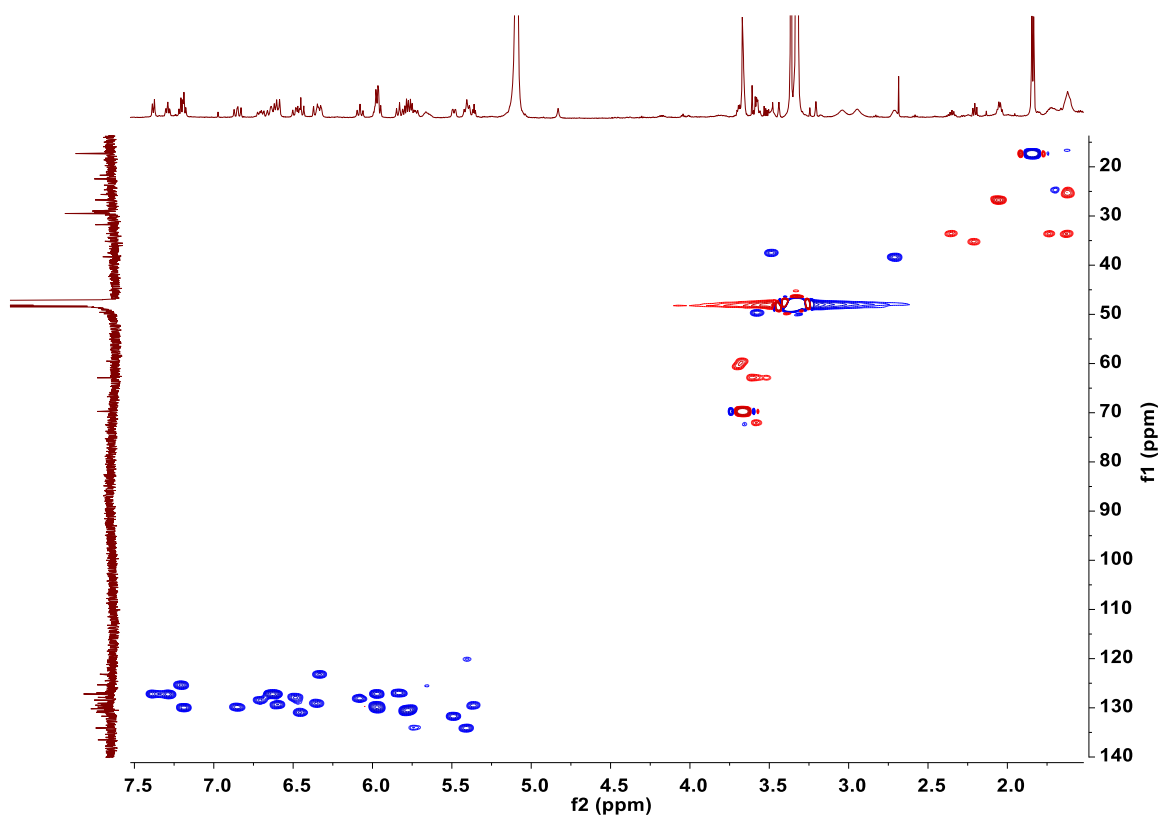

Figure S23. HSQC spectrum of compound **2** in CD<sub>3</sub>OD (600 MHz)

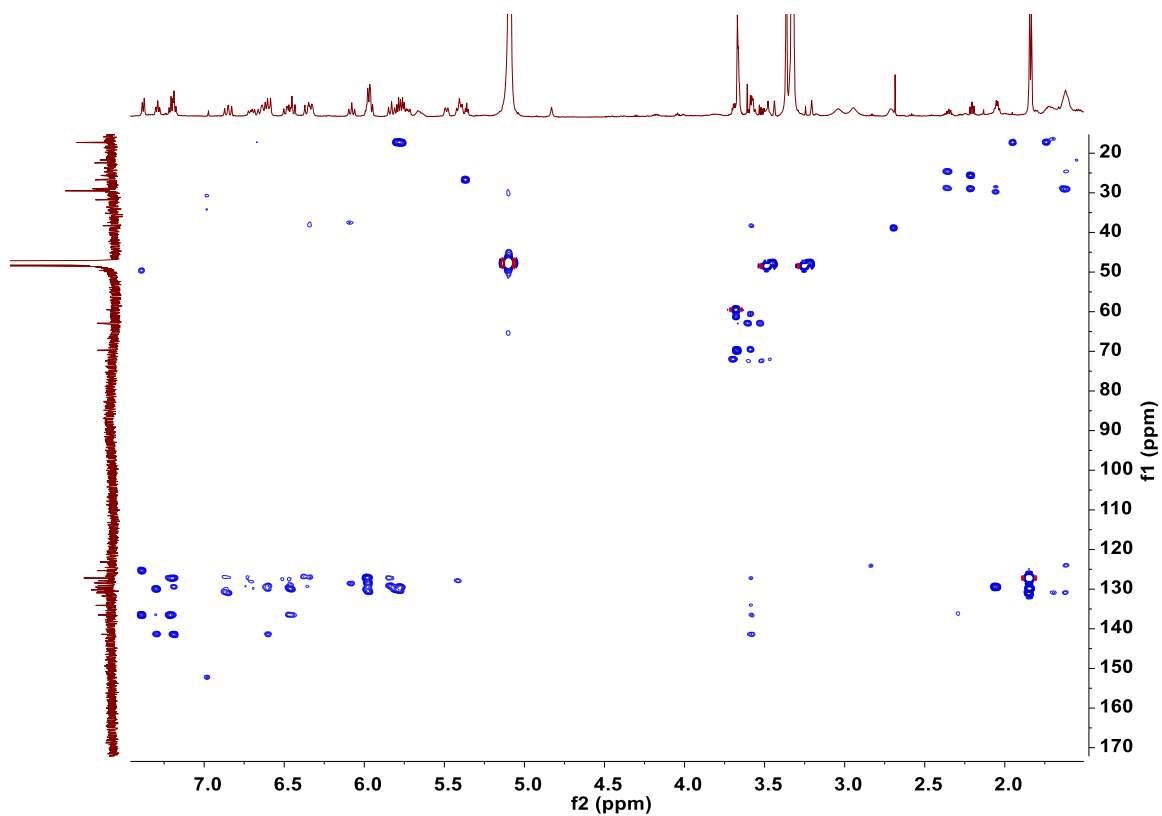

Figure S24. HMBC spectrum of compound **2** in CD<sub>3</sub>OD (600 MHz)

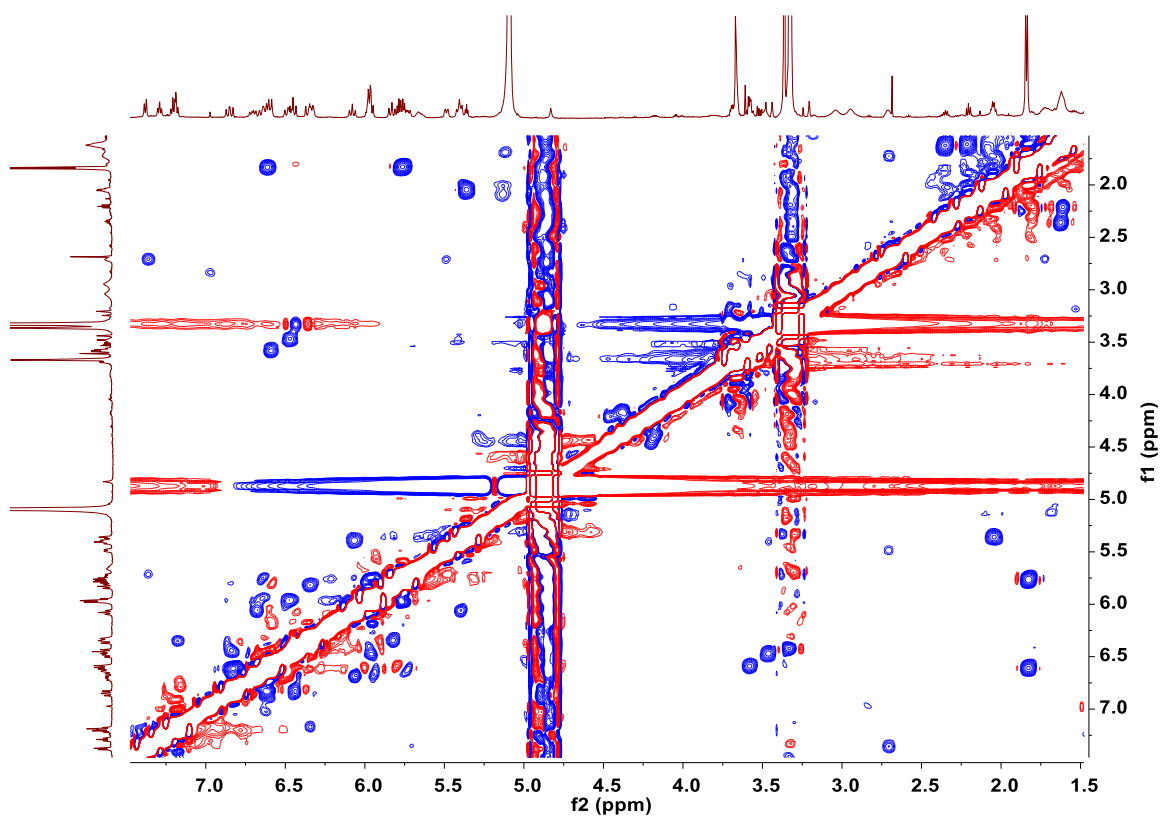

**Figure S25.** NOESY spectrum of compound **2** in CD<sub>3</sub>OD (600 MHz)

**Table S1.**  $^1\text{H}$  and  $^{13}\text{C}$  NMR data of **1** in  $\text{DMSO}-d_6$  (600 MHz)<sup>a</sup>

| <b>1</b>                                                                                                |                            |                               |
|---------------------------------------------------------------------------------------------------------|----------------------------|-------------------------------|
| Position                                                                                                | $\delta_{\text{C}}$ , type | $\delta_{\text{H}}$ (J in Hz) |
| 1                                                                                                       | <sup>b</sup>               | -                             |
| 2                                                                                                       | 39.8, CH <sub>2</sub>      | 2.60, m<br>2.47, m            |
| 3                                                                                                       | 42.1, CH                   | 3.49, m                       |
| 4                                                                                                       | 142.8, C                   | -                             |
| 5                                                                                                       | 127.7, CH                  | 7.28, d (7.6)                 |
| 6                                                                                                       | 127.5, CH                  | 7.23, t (7.0)                 |
| 7                                                                                                       | 126.0, CH                  | 7.19, t (7.6)                 |
| 8                                                                                                       | 130.2, CH                  | 7.12, d (7.5)                 |
| 9                                                                                                       | 137.1, C                   | -                             |
| 10                                                                                                      | 130.9, CH                  | 6.80, d (10.6)                |
| 11                                                                                                      | 130.9, CH                  | 6.42, m                       |
| 12                                                                                                      | 129.5, CH                  | 6.38, m                       |
| 13                                                                                                      | 130.7, CH                  | 6.88, t (13.0)                |
| 14                                                                                                      | 127.6, CH                  | 5.87, t (11.3)                |
| 15                                                                                                      | 130.6, CH                  | 5.98, m                       |
| 16                                                                                                      | 128.0, CH                  | 6.64, m                       |
| 17                                                                                                      | 131.6, CH                  | 5.79, m                       |
| 18                                                                                                      | 18.6, CH <sub>3</sub>      | 1.81, d (5.28)                |
| 1'                                                                                                      | 174.7, C                   | -                             |
| 2'                                                                                                      | 42.1, CH <sub>2</sub>      | 2.80, m                       |
| 3'                                                                                                      | 131.8, CH                  | 5.68, m                       |
| 4'                                                                                                      | 125.9, CH                  | 6.32, m                       |
| 5'                                                                                                      | 126.0, CH                  | 5.60, d (11.4)                |
| 6'                                                                                                      | <sup>b</sup>               | -                             |
| 7'                                                                                                      | 124.3, CH                  | 6.54, d (9.7)                 |
| 8'                                                                                                      | 132.3 CH                   | 5.73, m                       |
| 9'                                                                                                      | 38.0, CH                   | 2.63, m                       |
| 10'                                                                                                     | 32.9 CH <sub>2</sub>       | 1.51, m<br>1.40, m            |
| 11'                                                                                                     | 37.5 CH                    | 3.12, m                       |
| 12'                                                                                                     | 134.6 CH                   | 5.24, m                       |
| 13'                                                                                                     | 128.5, CH                  | 6.00, m                       |
| 14'                                                                                                     | 128.7, CH                  | 6.32, m                       |
| 15'                                                                                                     | 129.2 CH                   | 6.72, dd (14.6, 10.7)         |
| 16'                                                                                                     | 127.9, CH                  | 5.98, m                       |
| 17'                                                                                                     | 130.6, CH                  | 5.98, m                       |
| 18'                                                                                                     | 127.2, CH                  | 6.64, m                       |
| 19'                                                                                                     | 131.6, CH                  | 5.79, m                       |
| 20'                                                                                                     | 18.6, CH <sub>3</sub>      | 1.80, d (5.28)                |
| <sup>a</sup> the $^{13}\text{C}$ chemical shifts were obtained by combination of HSQC and HMBC analysis |                            |                               |
| <sup>b</sup> not detected                                                                               |                            |                               |



**Table S2.** Antibacterial activity of compounds **1** and **2** against the multi-drug resistant *Enterococcus faecalis* CCARM 5172

| Strain                                  | MIC ( $\mu$ M) |          |               |              |
|-----------------------------------------|----------------|----------|---------------|--------------|
|                                         | <b>1</b>       | <b>2</b> | Ciprofloxacin | Tetracycline |
| <i>Enterococcus faecalis</i> CCARM 5172 | 22.2           | 22.2     | 17.0          | >112.5       |

**Table S3.** Bacteria and plasmids used in this study

| Strains or plasmids              | Description                                                         | Reference or source |
|----------------------------------|---------------------------------------------------------------------|---------------------|
| <i>S. youssoufiensis</i> OUC6819 | wild type, isolated from the reeds rhizosphere soil                 | [1, 2]              |
| $\Delta dtlA$                    | <i>dtlA</i> inactivation mutant of <i>S. youssoufiensis</i> OUC6819 | [3]                 |

**Table S4.** The computational method and coordinates of (3*R*,9'*R*,11'*S*)-**1** for ECD calculation

td(nstates=50) cam-b3lyp/6-31g(d) scrf=(solvent=methanol)

|   |          |          |          |
|---|----------|----------|----------|
| C | 2.93553  | 1.57193  | -1.56795 |
| C | 2.00222  | 1.51061  | -2.59321 |
| C | 0.7781   | 2.14802  | -2.43943 |
| C | 0.45205  | 2.84476  | -1.27053 |
| C | 1.38924  | 2.88771  | -0.21354 |
| C | 2.62315  | 2.25099  | -0.39395 |
| C | 1.05815  | 3.57952  | 1.10421  |
| C | 0.46546  | 2.62776  | 2.19816  |
| C | 2.22959  | 4.39434  | 1.69627  |
| C | -0.93223 | 2.20548  | 1.85859  |
| C | -1.3238  | 0.94016  | 1.67836  |
| C | -0.83734 | 3.57148  | -1.2155  |
| C | 1.31405  | 1.41581  | 2.61658  |
| C | 1.06835  | 0.12132  | 1.81147  |
| C | -0.41832 | -0.20506 | 1.70986  |
| C | 1.87081  | -0.99014 | 2.42998  |
| C | -0.83995 | -1.47881 | 1.5619   |
| C | -2.20635 | -1.92088 | 1.33549  |
| C | -2.05375 | 3.04607  | -1.43789 |
| C | 2.79842  | -1.75929 | 1.84194  |
| C | -2.36279 | 1.6409   | -1.62516 |
| C | -3.61288 | 1.17404  | -1.80741 |
| C | -3.92197 | -0.23637 | -1.93315 |
| C | -5.14346 | -0.7818  | -2.1075  |
| C | -6.41083 | -0.07772 | -2.21457 |
| C | -7.58089 | -0.70357 | -2.39115 |
| C | -8.90844 | -0.02626 | -2.50884 |
| C | 3.21229  | -1.72455 | 0.44946  |
| C | 4.16168  | -2.53315 | -0.05735 |
| C | 4.57251  | -2.50755 | -1.44724 |
| C | 5.51275  | -3.28249 | -2.02459 |
| C | 6.31675  | -4.30959 | -1.38213 |
| C | 7.23162  | -5.03714 | -2.03441 |
| C | 8.08047  | -6.1028  | -1.4185  |
| C | -2.54707 | -3.20391 | 1.14103  |
| C | -3.95294 | -3.66642 | 0.89343  |
| C | 2.60709  | 5.64246  | 0.92097  |
| O | 2.72526  | 6.73011  | 1.43397  |
| O | 2.83225  | 5.50992  | -0.39724 |
| C | -4.60931 | -4.34269 | 2.09103  |
| O | -5.49687 | -5.15606 | 1.99853  |
| O | -4.17256 | -3.95299 | 3.29807  |
| H | 3.90488  | 1.09547  | -1.67262 |
| H | 2.23036  | 0.98809  | -3.51654 |
| H | 0.05949  | 2.13567  | -3.25224 |

|   |          |          |          |
|---|----------|----------|----------|
| H | 3.36124  | 2.26764  | 0.40138  |
| H | 0.25662  | 4.29807  | 0.90582  |
| H | 0.38004  | 3.27345  | 3.08242  |
| H | 3.13061  | 3.78202  | 1.81048  |
| H | 1.9605   | 4.74055  | 2.69515  |
| H | -1.67    | 2.99971  | 1.77839  |
| H | -2.37162 | 0.75514  | 1.46925  |
| H | -0.77809 | 4.63773  | -1.00678 |
| H | 2.38199  | 1.65379  | 2.58334  |
| H | 1.08614  | 1.20323  | 3.66774  |
| H | 1.41204  | 0.29336  | 0.78735  |
| H | 1.66725  | -1.16102 | 3.48652  |
| H | -0.09237 | -2.26826 | 1.5831   |
| H | -2.99456 | -1.17276 | 1.29145  |
| H | -2.90677 | 3.72237  | -1.42398 |
| H | 3.30265  | -2.50276 | 2.45814  |
| H | -1.53901 | 0.93295  | -1.57425 |
| H | -4.43323 | 1.88746  | -1.853   |
| H | -3.06994 | -0.91098 | -1.87311 |
| H | -5.20507 | -1.86628 | -2.18222 |
| H | -6.4044  | 1.00848  | -2.14934 |
| H | -7.58508 | -1.79186 | -2.45658 |
| H | -8.81379 | 1.06061  | -2.43241 |
| H | -9.38731 | -0.2627  | -3.46659 |
| H | -9.59531 | -0.36714 | -1.72492 |
| H | 2.72666  | -1.01283 | -0.21435 |
| H | 4.64593  | -3.24429 | 0.60893  |
| H | 4.05729  | -1.7832  | -2.07572 |
| H | 5.70363  | -3.1379  | -3.08659 |
| H | 6.16481  | -4.49348 | -0.32035 |
| H | 7.383    | -4.85215 | -3.0982  |
| H | 7.92042  | -7.06871 | -1.91245 |
| H | 9.14649  | -5.87005 | -1.52808 |
| H | 7.86433  | -6.22337 | -0.3532  |
| H | -1.77668 | -3.97314 | 1.17253  |
| H | -4.00839 | -4.37677 | 0.06475  |
| H | -4.59155 | -2.81469 | 0.62815  |
| H | 2.70845  | 4.58479  | -0.67988 |
| H | -3.44394 | -3.31328 | 3.18363  |

Standard orientation:

| Center<br>Number | Atomic<br>Number | Atomic<br>Type | Coordinates (Angstroms) |          |           |
|------------------|------------------|----------------|-------------------------|----------|-----------|
|                  |                  |                | X                       | Y        | Z         |
| 1                | 6                | 0              | 2.935528                | 1.571925 | -1.567954 |
| 2                | 6                | 0              | 2.002220                | 1.510612 | -2.593205 |

|    |   |   |           |           |           |
|----|---|---|-----------|-----------|-----------|
| 3  | 6 | 0 | 0.778095  | 2.148017  | -2.439430 |
| 4  | 6 | 0 | 0.452052  | 2.844758  | -1.270528 |
| 5  | 6 | 0 | 1.389244  | 2.887708  | -0.213544 |
| 6  | 6 | 0 | 2.623146  | 2.250990  | -0.393949 |
| 7  | 6 | 0 | 1.058145  | 3.579523  | 1.104214  |
| 8  | 6 | 0 | 0.465461  | 2.627763  | 2.198160  |
| 9  | 6 | 0 | 2.229586  | 4.394342  | 1.696273  |
| 10 | 6 | 0 | -0.932228 | 2.205476  | 1.858588  |
| 11 | 6 | 0 | -1.323800 | 0.940161  | 1.678357  |
| 12 | 6 | 0 | -0.837343 | 3.571477  | -1.215497 |
| 13 | 6 | 0 | 1.314054  | 1.415812  | 2.616576  |
| 14 | 6 | 0 | 1.068345  | 0.121319  | 1.811469  |
| 15 | 6 | 0 | -0.418318 | -0.205057 | 1.709856  |
| 16 | 6 | 0 | 1.870806  | -0.990142 | 2.429977  |
| 17 | 6 | 0 | -0.839954 | -1.478805 | 1.561903  |
| 18 | 6 | 0 | -2.206350 | -1.920879 | 1.335486  |
| 19 | 6 | 0 | -2.053745 | 3.046074  | -1.437891 |
| 20 | 6 | 0 | 2.798420  | -1.759287 | 1.841941  |
| 21 | 6 | 0 | -2.362788 | 1.640902  | -1.625160 |
| 22 | 6 | 0 | -3.612880 | 1.174037  | -1.807414 |
| 23 | 6 | 0 | -3.921971 | -0.236374 | -1.933153 |
| 24 | 6 | 0 | -5.143457 | -0.781798 | -2.107503 |
| 25 | 6 | 0 | -6.410832 | -0.077721 | -2.214568 |
| 26 | 6 | 0 | -7.580891 | -0.703567 | -2.391146 |
| 27 | 6 | 0 | -8.908444 | -0.026257 | -2.508841 |
| 28 | 6 | 0 | 3.212291  | -1.724547 | 0.449462  |
| 29 | 6 | 0 | 4.161682  | -2.533149 | -0.057352 |
| 30 | 6 | 0 | 4.572514  | -2.507549 | -1.447238 |
| 31 | 6 | 0 | 5.512750  | -3.282491 | -2.024589 |
| 32 | 6 | 0 | 6.316747  | -4.309585 | -1.382134 |
| 33 | 6 | 0 | 7.231622  | -5.037135 | -2.034414 |
| 34 | 6 | 0 | 8.080474  | -6.102801 | -1.418503 |
| 35 | 6 | 0 | -2.547074 | -3.203911 | 1.141030  |
| 36 | 6 | 0 | -3.952940 | -3.666417 | 0.893428  |
| 37 | 6 | 0 | 2.607087  | 5.642464  | 0.920972  |
| 38 | 8 | 0 | 2.725260  | 6.730109  | 1.433966  |
| 39 | 8 | 0 | 2.832247  | 5.509918  | -0.397242 |
| 40 | 6 | 0 | -4.609306 | -4.342694 | 2.091034  |
| 41 | 8 | 0 | -5.496874 | -5.156057 | 1.998531  |
| 42 | 8 | 0 | -4.172560 | -3.952987 | 3.298072  |
| 43 | 1 | 0 | 3.904879  | 1.095473  | -1.672615 |
| 44 | 1 | 0 | 2.230362  | 0.988092  | -3.516537 |
| 45 | 1 | 0 | 0.059492  | 2.135675  | -3.252242 |
| 46 | 1 | 0 | 3.361236  | 2.267639  | 0.401376  |
| 47 | 1 | 0 | 0.256620  | 4.298066  | 0.905816  |
| 48 | 1 | 0 | 0.380037  | 3.273451  | 3.082422  |
| 49 | 1 | 0 | 3.130605  | 3.782015  | 1.810480  |
| 50 | 1 | 0 | 1.960502  | 4.740554  | 2.695153  |

|    |   |   |           |           |           |
|----|---|---|-----------|-----------|-----------|
| 51 | 1 | 0 | -1.669996 | 2.999707  | 1.778392  |
| 52 | 1 | 0 | -2.371619 | 0.755136  | 1.469251  |
| 53 | 1 | 0 | -0.778085 | 4.637730  | -1.006782 |
| 54 | 1 | 0 | 2.381987  | 1.653792  | 2.583336  |
| 55 | 1 | 0 | 1.086139  | 1.203225  | 3.667742  |
| 56 | 1 | 0 | 1.412039  | 0.293356  | 0.787349  |
| 57 | 1 | 0 | 1.667250  | -1.161020 | 3.486515  |
| 58 | 1 | 0 | -0.092368 | -2.268262 | 1.583100  |
| 59 | 1 | 0 | -2.994555 | -1.172759 | 1.291451  |
| 60 | 1 | 0 | -2.906766 | 3.722371  | -1.423976 |
| 61 | 1 | 0 | 3.302649  | -2.502756 | 2.458140  |
| 62 | 1 | 0 | -1.539014 | 0.932947  | -1.574247 |
| 63 | 1 | 0 | -4.433232 | 1.887462  | -1.852996 |
| 64 | 1 | 0 | -3.069940 | -0.910982 | -1.873113 |
| 65 | 1 | 0 | -5.205073 | -1.866275 | -2.182219 |
| 66 | 1 | 0 | -6.404404 | 1.008480  | -2.149335 |
| 67 | 1 | 0 | -7.585075 | -1.791861 | -2.456579 |
| 68 | 1 | 0 | -8.813788 | 1.060611  | -2.432414 |
| 69 | 1 | 0 | -9.387310 | -0.262696 | -3.466593 |
| 70 | 1 | 0 | -9.595309 | -0.367139 | -1.724917 |
| 71 | 1 | 0 | 2.726661  | -1.012833 | -0.214354 |
| 72 | 1 | 0 | 4.645926  | -3.244287 | 0.608928  |
| 73 | 1 | 0 | 4.057291  | -1.783202 | -2.075723 |
| 74 | 1 | 0 | 5.703626  | -3.137902 | -3.086588 |
| 75 | 1 | 0 | 6.164807  | -4.493477 | -0.320348 |
| 76 | 1 | 0 | 7.383004  | -4.852145 | -3.098202 |
| 77 | 1 | 0 | 7.920417  | -7.068707 | -1.912451 |
| 78 | 1 | 0 | 9.146493  | -5.870052 | -1.528081 |
| 79 | 1 | 0 | 7.864334  | -6.223366 | -0.353197 |
| 80 | 1 | 0 | -1.776678 | -3.973136 | 1.172525  |
| 81 | 1 | 0 | -4.008386 | -4.376768 | 0.064747  |
| 82 | 1 | 0 | -4.591546 | -2.814691 | 0.628152  |
| 83 | 1 | 0 | 2.708454  | 4.584787  | -0.679881 |
| 84 | 1 | 0 | -3.443937 | -3.313281 | 3.183629  |

---

**Table S5.** The computational method and coordinates of (3*S*,9*S*,11'*R*)-**1** for ECD calculation

td(nstates=50) cam-b3lyp/6-31g(d) scrf=(solvent=methanol)

|   |          |          |          |
|---|----------|----------|----------|
| C | -3.0321  | -1.5602  | 1.46882  |
| C | -2.10124 | -1.50483 | 2.49828  |
| C | -0.88152 | -2.15094 | 2.34822  |
| C | -0.55846 | -2.84538 | 1.17624  |
| C | -1.48919 | -2.87354 | 0.11685  |
| C | -2.72059 | -2.23853 | 0.29555  |
| C | -1.16116 | -3.56533 | -1.19788 |
| C | -0.54763 | -2.638   | -2.29843 |
| C | -2.35848 | -4.34471 | -1.77158 |
| C | 0.87581  | -2.28523 | -1.98541 |
| C | 1.32718  | -1.04228 | -1.78927 |
| C | 0.71349  | -3.60257 | 1.12705  |
| C | -1.34371 | -1.38148 | -2.68721 |
| C | -1.02793 | -0.11513 | -1.8623  |
| C | 0.47328  | 0.14257  | -1.77809 |
| C | -1.78496 | 1.04379  | -2.44984 |
| C | 0.95424  | 1.39191  | -1.60542 |
| C | 2.34245  | 1.77223  | -1.39812 |
| C | 1.94267  | -3.1168  | 1.36755  |
| C | -2.68521 | 1.83096  | -1.8432  |
| C | 2.29001  | -1.72243 | 1.56815  |
| C | 3.54863  | -1.2925  | 1.78002  |
| C | 3.89579  | 0.10792  | 1.91789  |
| C | 5.12692  | 0.61766  | 2.12769  |
| C | 6.36963  | -0.12339 | 2.27027  |
| C | 7.55267  | 0.46658  | 2.48057  |
| C | 8.85548  | -0.25051 | 2.63507  |
| C | -3.10808 | 1.76869  | -0.45444 |
| C | -4.02514 | 2.59937  | 0.07569  |
| C | -4.44401 | 2.54238  | 1.46234  |
| C | -5.35314 | 3.33564  | 2.0641   |
| C | -6.10964 | 4.41817  | 1.45574  |
| C | -6.99588 | 5.1611   | 2.12979  |
| C | -7.79578 | 6.28263  | 1.54831  |
| C | 2.73227  | 3.03193  | -1.17127 |
| C | 4.16277  | 3.42872  | -0.92065 |
| C | -2.96947 | -5.31076 | -0.79028 |
| O | -4.15142 | -5.42409 | -0.55762 |
| O | -2.04263 | -6.07752 | -0.18898 |
| C | 4.72559  | 4.26751  | -2.0542  |
| O | 5.58171  | 3.8953   | -2.81765 |
| O | 4.19577  | 5.49749  | -2.20565 |
| H | -4.00041 | -1.08094 | 1.57456  |
| H | -2.32969 | -0.98208 | 3.42178  |
| H | -0.16663 | -2.14933 | 3.16476  |

|   |          |          |          |
|---|----------|----------|----------|
| H | -3.45957 | -2.26466 | -0.49841 |
| H | -0.38874 | -4.31066 | -0.99277 |
| H | -0.51512 | -3.27912 | -3.1906  |
| H | -3.15823 | -3.69357 | -2.12712 |
| H | -2.01246 | -4.92782 | -2.63274 |
| H | 1.57818  | -3.11351 | -1.9339  |
| H | 2.38589  | -0.90664 | -1.59649 |
| H | 0.62301  | -4.665   | 0.90861  |
| H | -2.42092 | -1.56995 | -2.64077 |
| H | -1.12031 | -1.16137 | -3.738   |
| H | -1.36756 | -0.29322 | -0.83792 |
| H | -1.5701  | 1.23779  | -3.50023 |
| H | 0.24039  | 2.21252  | -1.59013 |
| H | 3.10241  | 0.99503  | -1.4065  |
| H | 2.7758   | -3.81779 | 1.35959  |
| H | -3.1569  | 2.61189  | -2.4386  |
| H | 1.48767  | -0.99119 | 1.50321  |
| H | 4.34684  | -2.02956 | 1.84112  |
| H | 3.066    | 0.80719  | 1.83347  |
| H | 5.21812  | 1.69989  | 2.20446  |
| H | 6.33243  | -1.20897 | 2.20383  |
| H | 7.58806  | 1.55427  | 2.54729  |
| H | 9.31429  | -0.02897 | 3.60615  |
| H | 9.57426  | 0.06917  | 1.87105  |
| H | 8.73028  | -1.33405 | 2.55502  |
| H | -2.65858 | 1.01353  | 0.18629  |
| H | -4.47536 | 3.35316  | -0.56725 |
| H | -3.96345 | 1.77422  | 2.06586  |
| H | -5.55533 | 3.16157  | 3.11957  |
| H | -5.94492 | 4.63209  | 0.40149  |
| H | -7.16027 | 4.94597  | 3.18597  |
| H | -7.59808 | 7.22318  | 2.07641  |
| H | -8.87127 | 6.09145  | 1.64514  |
| H | -7.56885 | 6.43107  | 0.48876  |
| H | 1.98506  | 3.82448  | -1.15401 |
| H | 4.24041  | 4.00516  | 0.01064  |
| H | 4.79623  | 2.54588  | -0.82446 |
| H | -2.51281 | -6.67388 | 0.42221  |
| H | 3.54945  | 5.692    | -1.50774 |

Standard orientation:

| Center<br>Number | Atomic<br>Number | Atomic<br>Type | Coordinates (Angstroms) |           |          |
|------------------|------------------|----------------|-------------------------|-----------|----------|
|                  |                  |                | X                       | Y         | Z        |
| 1                | 6                | 0              | -3.032099               | -1.560196 | 1.468821 |
| 2                | 6                | 0              | -2.101239               | -1.504832 | 2.498278 |

|    |   |   |           |           |           |
|----|---|---|-----------|-----------|-----------|
| 3  | 6 | 0 | -0.881520 | -2.150936 | 2.348215  |
| 4  | 6 | 0 | -0.558463 | -2.845379 | 1.176236  |
| 5  | 6 | 0 | -1.489185 | -2.873541 | 0.116848  |
| 6  | 6 | 0 | -2.720593 | -2.238528 | 0.295545  |
| 7  | 6 | 0 | -1.161157 | -3.565330 | -1.197878 |
| 8  | 6 | 0 | -0.547634 | -2.638002 | -2.298432 |
| 9  | 6 | 0 | -2.358477 | -4.344713 | -1.771583 |
| 10 | 6 | 0 | 0.875808  | -2.285229 | -1.985406 |
| 11 | 6 | 0 | 1.327178  | -1.042275 | -1.789268 |
| 12 | 6 | 0 | 0.713486  | -3.602569 | 1.127049  |
| 13 | 6 | 0 | -1.343706 | -1.381483 | -2.687209 |
| 14 | 6 | 0 | -1.027934 | -0.115130 | -1.862296 |
| 15 | 6 | 0 | 0.473282  | 0.142568  | -1.778086 |
| 16 | 6 | 0 | -1.784959 | 1.043792  | -2.449841 |
| 17 | 6 | 0 | 0.954235  | 1.391910  | -1.605423 |
| 18 | 6 | 0 | 2.342451  | 1.772230  | -1.398117 |
| 19 | 6 | 0 | 1.942670  | -3.116802 | 1.367545  |
| 20 | 6 | 0 | -2.685212 | 1.830964  | -1.843200 |
| 21 | 6 | 0 | 2.290014  | -1.722430 | 1.568151  |
| 22 | 6 | 0 | 3.548634  | -1.292498 | 1.780017  |
| 23 | 6 | 0 | 3.895787  | 0.107919  | 1.917890  |
| 24 | 6 | 0 | 5.126918  | 0.617659  | 2.127691  |
| 25 | 6 | 0 | 6.369627  | -0.123389 | 2.270269  |
| 26 | 6 | 0 | 7.552668  | 0.466578  | 2.480574  |
| 27 | 6 | 0 | 8.855482  | -0.250509 | 2.635072  |
| 28 | 6 | 0 | -3.108079 | 1.768687  | -0.454435 |
| 29 | 6 | 0 | -4.025137 | 2.599369  | 0.075692  |
| 30 | 6 | 0 | -4.444014 | 2.542377  | 1.462344  |
| 31 | 6 | 0 | -5.353137 | 3.335638  | 2.064096  |
| 32 | 6 | 0 | -6.109643 | 4.418165  | 1.455740  |
| 33 | 6 | 0 | -6.995883 | 5.161104  | 2.129793  |
| 34 | 6 | 0 | -7.795775 | 6.282631  | 1.548310  |
| 35 | 6 | 0 | 2.732269  | 3.031925  | -1.171268 |
| 36 | 6 | 0 | 4.162774  | 3.428719  | -0.920653 |
| 37 | 6 | 0 | -2.969469 | -5.310755 | -0.790280 |
| 38 | 8 | 0 | -4.151421 | -5.424088 | -0.557616 |
| 39 | 8 | 0 | -2.042627 | -6.077524 | -0.188978 |
| 40 | 6 | 0 | 4.725590  | 4.267513  | -2.054202 |
| 41 | 8 | 0 | 5.581709  | 3.895300  | -2.817653 |
| 42 | 8 | 0 | 4.195768  | 5.497490  | -2.205653 |
| 43 | 1 | 0 | -4.000407 | -1.080941 | 1.574559  |
| 44 | 1 | 0 | -2.329687 | -0.982081 | 3.421779  |
| 45 | 1 | 0 | -0.166625 | -2.149330 | 3.164759  |
| 46 | 1 | 0 | -3.459569 | -2.264655 | -0.498406 |
| 47 | 1 | 0 | -0.388742 | -4.310661 | -0.992768 |
| 48 | 1 | 0 | -0.515118 | -3.279120 | -3.190603 |
| 49 | 1 | 0 | -3.158232 | -3.693569 | -2.127118 |
| 50 | 1 | 0 | -2.012457 | -4.927815 | -2.632739 |



|    |   |   |           |           |           |
|----|---|---|-----------|-----------|-----------|
| 51 | 1 | 0 | 1.578178  | -3.113508 | -1.933899 |
| 52 | 1 | 0 | 2.385889  | -0.906638 | -1.596491 |
| 53 | 1 | 0 | 0.623005  | -4.664997 | 0.908608  |
| 54 | 1 | 0 | -2.420916 | -1.569951 | -2.640772 |
| 55 | 1 | 0 | -1.120313 | -1.161372 | -3.738001 |
| 56 | 1 | 0 | -1.367557 | -0.293215 | -0.837915 |
| 57 | 1 | 0 | -1.570101 | 1.237792  | -3.500230 |
| 58 | 1 | 0 | 0.240388  | 2.212515  | -1.590133 |
| 59 | 1 | 0 | 3.102407  | 0.995025  | -1.406504 |
| 60 | 1 | 0 | 2.775795  | -3.817792 | 1.359591  |
| 61 | 1 | 0 | -3.156904 | 2.611890  | -2.438595 |
| 62 | 1 | 0 | 1.487669  | -0.991189 | 1.503211  |
| 63 | 1 | 0 | 4.346837  | -2.029557 | 1.841119  |
| 64 | 1 | 0 | 3.065998  | 0.807194  | 1.833472  |
| 65 | 1 | 0 | 5.218124  | 1.699891  | 2.204456  |
| 66 | 1 | 0 | 6.332431  | -1.208974 | 2.203834  |
| 67 | 1 | 0 | 7.588057  | 1.554269  | 2.547290  |
| 68 | 1 | 0 | 9.314288  | -0.028966 | 3.606147  |
| 69 | 1 | 0 | 9.574260  | 0.069173  | 1.871047  |
| 70 | 1 | 0 | 8.730280  | -1.334049 | 2.555021  |
| 71 | 1 | 0 | -2.658580 | 1.013534  | 0.186291  |
| 72 | 1 | 0 | -4.475355 | 3.353163  | -0.567247 |
| 73 | 1 | 0 | -3.963447 | 1.774220  | 2.065858  |
| 74 | 1 | 0 | -5.555327 | 3.161566  | 3.119570  |
| 75 | 1 | 0 | -5.944922 | 4.632091  | 0.401491  |
| 76 | 1 | 0 | -7.160272 | 4.945971  | 3.185968  |
| 77 | 1 | 0 | -7.598078 | 7.223175  | 2.076413  |
| 78 | 1 | 0 | -8.871266 | 6.091447  | 1.645138  |
| 79 | 1 | 0 | -7.568854 | 6.431066  | 0.488757  |
| 80 | 1 | 0 | 1.985056  | 3.824484  | -1.154007 |
| 81 | 1 | 0 | 4.240410  | 4.005158  | 0.010641  |
| 82 | 1 | 0 | 4.796234  | 2.545876  | -0.824458 |
| 83 | 1 | 0 | -2.512814 | -6.673875 | 0.422207  |
| 84 | 1 | 0 | 3.549449  | 5.692004  | -1.507741 |

---

**Table S6.** The computational method and coordinates of (5*R*,7'*R*,9'*S*)-**2** for ECD calculation

td(nstates=50) cam-b3lyp/6-31g(d) scrf=(solvent=methanol)

|   |          |          |          |
|---|----------|----------|----------|
| C | -1.48051 | -2.38644 | 3.70146  |
| C | -2.8198  | -2.0489  | 3.73695  |
| C | -3.5159  | -1.92951 | 2.55287  |
| C | -2.90035 | -2.12779 | 1.3187   |
| C | -1.53942 | -2.45832 | 1.27923  |
| C | -0.86028 | -2.59127 | 2.48584  |
| C | -0.81411 | -2.70012 | -0.04532 |
| C | 0.09824  | -1.53886 | -0.56492 |
| C | -0.05002 | -4.00612 | -0.02377 |
| C | -0.70716 | -0.34264 | -0.98953 |
| C | -0.50614 | 0.89893  | -0.58272 |
| C | -3.73842 | -2.06458 | 0.08954  |
| C | 1.29699  | -1.11319 | 0.29916  |
| C | 1.02272  | 0.08684  | 1.22943  |
| C | 0.49124  | 1.2764   | 0.43645  |
| C | 2.197    | 0.3386   | 2.1576   |
| C | 0.82239  | 2.53113  | 0.70374  |
| C | 0.30097  | 3.78423  | 0.03868  |
| C | -4.53243 | -1.07393 | -0.29553 |
| C | 3.43837  | 0.71018  | 1.8756   |
| C | -4.69089 | 0.23141  | 0.34209  |
| C | -5.55015 | 1.14834  | -0.09273 |
| C | -5.70033 | 2.45982  | 0.53134  |
| C | -6.53343 | 3.43082  | 0.16313  |
| C | -7.48674 | 3.41081  | -0.94744 |
| C | -8.27706 | 4.43317  | -1.23505 |
| C | -9.26927 | 4.46769  | -2.35763 |
| C | 4.00097  | 1.05426  | 0.56988  |
| C | 5.2772   | 1.386    | 0.39922  |
| C | 5.84397  | 1.73404  | -0.90085 |
| C | 7.10459  | 2.07489  | -1.15967 |
| C | 8.21014  | 2.18148  | -0.20613 |
| C | 9.43768  | 2.52498  | -0.56345 |
| C | 10.60472 | 2.64917  | 0.3685   |
| C | -0.33491 | -5.03223 | -0.79731 |
| C | 0.42278  | -6.3358  | -0.77061 |
| C | 1.10438  | -6.63749 | -2.08186 |
| O | 2.2702   | -6.8246  | -2.21519 |
| O | 0.25975  | -6.68665 | -3.09862 |
| C | 1.41663  | 4.47808  | -0.70493 |
| O | 2.09025  | 5.35036  | -0.25944 |
| O | 1.59651  | 3.99898  | -1.92443 |
| H | -0.92153 | -2.49697 | 4.61221  |
| H | -3.32118 | -1.89586 | 4.67459  |
| H | -4.56436 | -1.70049 | 2.57941  |

|   |          |          |          |
|---|----------|----------|----------|
| H | 0.17826  | -2.85886 | 2.48607  |
| H | -1.56814 | -2.80803 | -0.8101  |
| H | 0.51183  | -1.95002 | -1.48181 |
| H | 0.77537  | -4.09103 | 0.6624   |
| H | -1.48034 | -0.52513 | -1.71563 |
| H | -1.11667 | 1.6739   | -1.00463 |
| H | -3.71509 | -2.9395  | -0.53645 |
| H | 1.65887  | -1.94042 | 0.89466  |
| H | 2.10734  | -0.85371 | -0.37034 |
| H | 0.19874  | -0.19922 | 1.87045  |
| H | 1.98894  | 0.13989  | 3.1952   |
| H | 1.54226  | 2.71669  | 1.47859  |
| H | -0.50332 | 3.58795  | -0.6512  |
| H | -0.05021 | 4.47365  | 0.79485  |
| H | -5.11024 | -1.22402 | -1.19213 |
| H | 4.12806  | 0.78154  | 2.70068  |
| H | -4.0689  | 0.45372  | 1.19057  |
| H | -6.16715 | 0.91758  | -0.94319 |
| H | -5.06249 | 2.64514  | 1.3789   |
| H | -6.51583 | 4.34159  | 0.73777  |
| H | -7.5431  | 2.52316  | -1.55294 |
| H | -8.2197  | 5.32279  | -0.62707 |
| H | -9.04711 | 5.28357  | -3.03896 |
| H | -9.2668  | 3.54145  | -2.91919 |
| H | -10.272  | 4.63604  | -1.97631 |
| H | 3.34651  | 1.0467   | -0.28206 |
| H | 5.9273   | 1.39946  | 1.2562   |
| H | 5.15551  | 1.70608  | -1.72844 |
| H | 7.35591  | 2.30095  | -2.18233 |
| H | 8.00989  | 1.96996  | 0.82968  |
| H | 9.63743  | 2.73699  | -1.60247 |
| H | 11.01103 | 3.65583  | 0.34027  |
| H | 10.32415 | 2.42108  | 1.38956  |
| H | 11.40345 | 1.97553  | 0.07272  |
| H | -1.15549 | -4.97432 | -1.49205 |
| H | 1.17967  | -6.33207 | -0.00134 |
| H | -0.26259 | -7.15503 | -0.5744  |
| H | 0.73009  | -6.87745 | -3.90025 |
| H | 2.32577  | 4.44165  | -2.33987 |

Standard orientation:

| Center<br>Number | Atomic<br>Number | Atomic<br>Type | Coordinates (Angstroms) |          |          |
|------------------|------------------|----------------|-------------------------|----------|----------|
|                  |                  |                | X                       | Y        | Z        |
| 1                | 6                | 0              | 1.480510                | 2.386438 | 3.701459 |
| 2                | 6                | 0              | 2.819800                | 2.048896 | 3.736954 |

|    |   |   |            |           |           |
|----|---|---|------------|-----------|-----------|
| 3  | 6 | 0 | 3.515901   | 1.929512  | 2.552874  |
| 4  | 6 | 0 | 2.900345   | 2.127786  | 1.318701  |
| 5  | 6 | 0 | 1.539420   | 2.458323  | 1.279232  |
| 6  | 6 | 0 | 0.860282   | 2.591265  | 2.485844  |
| 7  | 6 | 0 | 0.814110   | 2.700115  | -0.045323 |
| 8  | 6 | 0 | -0.098236  | 1.538855  | -0.564921 |
| 9  | 6 | 0 | 0.050018   | 4.006116  | -0.023768 |
| 10 | 6 | 0 | 0.707155   | 0.342636  | -0.989529 |
| 11 | 6 | 0 | 0.506143   | -0.898930 | -0.582722 |
| 12 | 6 | 0 | 3.738418   | 2.064584  | 0.089540  |
| 13 | 6 | 0 | -1.296992  | 1.113188  | 0.299164  |
| 14 | 6 | 0 | -1.022723  | -0.086843 | 1.229431  |
| 15 | 6 | 0 | -0.491238  | -1.276398 | 0.436451  |
| 16 | 6 | 0 | -2.197004  | -0.338596 | 2.157604  |
| 17 | 6 | 0 | -0.822390  | -2.531125 | 0.703737  |
| 18 | 6 | 0 | -0.300970  | -3.784225 | 0.038682  |
| 19 | 6 | 0 | 4.532427   | 1.073926  | -0.295527 |
| 20 | 6 | 0 | -3.438370  | -0.710175 | 1.875601  |
| 21 | 6 | 0 | 4.690888   | -0.231405 | 0.342091  |
| 22 | 6 | 0 | 5.550149   | -1.148343 | -0.092730 |
| 23 | 6 | 0 | 5.700333   | -2.459815 | 0.531344  |
| 24 | 6 | 0 | 6.533428   | -3.430819 | 0.163134  |
| 25 | 6 | 0 | 7.486739   | -3.410807 | -0.947441 |
| 26 | 6 | 0 | 8.277059   | -4.433171 | -1.235054 |
| 27 | 6 | 0 | 9.269268   | -4.467690 | -2.357626 |
| 28 | 6 | 0 | -4.000971  | -1.054257 | 0.569878  |
| 29 | 6 | 0 | -5.277200  | -1.385998 | 0.399215  |
| 30 | 6 | 0 | -5.843973  | -1.734040 | -0.900845 |
| 31 | 6 | 0 | -7.104594  | -2.074890 | -1.159673 |
| 32 | 6 | 0 | -8.210144  | -2.181481 | -0.206133 |
| 33 | 6 | 0 | -9.437679  | -2.524981 | -0.563454 |
| 34 | 6 | 0 | -10.604723 | -2.649174 | 0.368502  |
| 35 | 6 | 0 | 0.334905   | 5.032233  | -0.797312 |
| 36 | 6 | 0 | -0.422783  | 6.335804  | -0.770614 |
| 37 | 6 | 0 | -1.104380  | 6.637490  | -2.081856 |
| 38 | 8 | 0 | -2.270196  | 6.824595  | -2.215192 |
| 39 | 8 | 0 | -0.259746  | 6.686646  | -3.098615 |
| 40 | 6 | 0 | -1.416629  | -4.478081 | -0.704932 |
| 41 | 8 | 0 | -2.090254  | -5.350356 | -0.259444 |
| 42 | 8 | 0 | -1.596510  | -3.998978 | -1.924434 |
| 43 | 1 | 0 | 0.921525   | 2.496973  | 4.612205  |
| 44 | 1 | 0 | 3.321180   | 1.895864  | 4.674586  |
| 45 | 1 | 0 | 4.564363   | 1.700488  | 2.579407  |
| 46 | 1 | 0 | -0.178264  | 2.858863  | 2.486070  |
| 47 | 1 | 0 | 1.568140   | 2.808029  | -0.810100 |
| 48 | 1 | 0 | -0.511832  | 1.950023  | -1.481805 |
| 49 | 1 | 0 | -0.775370  | 4.091033  | 0.662396  |
| 50 | 1 | 0 | 1.480337   | 0.525125  | -1.715632 |

|    |   |   |            |           |           |
|----|---|---|------------|-----------|-----------|
| 51 | 1 | 0 | 1.116673   | -1.673897 | -1.004626 |
| 52 | 1 | 0 | 3.715090   | 2.939496  | -0.536450 |
| 53 | 1 | 0 | -1.658866  | 1.940420  | 0.894655  |
| 54 | 1 | 0 | -2.107337  | 0.853705  | -0.370337 |
| 55 | 1 | 0 | -0.198740  | 0.199217  | 1.870445  |
| 56 | 1 | 0 | -1.988941  | -0.139894 | 3.195195  |
| 57 | 1 | 0 | -1.542262  | -2.716689 | 1.478592  |
| 58 | 1 | 0 | 0.503315   | -3.587953 | -0.651200 |
| 59 | 1 | 0 | 0.050209   | -4.473654 | 0.794845  |
| 60 | 1 | 0 | 5.110244   | 1.224024  | -1.192125 |
| 61 | 1 | 0 | -4.128057  | -0.781537 | 2.700678  |
| 62 | 1 | 0 | 4.068896   | -0.453724 | 1.190572  |
| 63 | 1 | 0 | 6.167152   | -0.917580 | -0.943189 |
| 64 | 1 | 0 | 5.062491   | -2.645141 | 1.378901  |
| 65 | 1 | 0 | 6.515827   | -4.341593 | 0.737767  |
| 66 | 1 | 0 | 7.543104   | -2.523163 | -1.552935 |
| 67 | 1 | 0 | 8.219701   | -5.322791 | -0.627070 |
| 68 | 1 | 0 | 9.047113   | -5.283569 | -3.038957 |
| 69 | 1 | 0 | 9.266805   | -3.541445 | -2.919188 |
| 70 | 1 | 0 | 10.272001  | -4.636044 | -1.976306 |
| 71 | 1 | 0 | -3.346509  | -1.046702 | -0.282057 |
| 72 | 1 | 0 | -5.927295  | -1.399464 | 1.256198  |
| 73 | 1 | 0 | -5.155514  | -1.706080 | -1.728443 |
| 74 | 1 | 0 | -7.355907  | -2.300952 | -2.182327 |
| 75 | 1 | 0 | -8.009894  | -1.969962 | 0.829683  |
| 76 | 1 | 0 | -9.637433  | -2.736992 | -1.602473 |
| 77 | 1 | 0 | -11.011033 | -3.655829 | 0.340271  |
| 78 | 1 | 0 | -10.324147 | -2.421076 | 1.389555  |
| 79 | 1 | 0 | -11.403450 | -1.975533 | 0.072721  |
| 80 | 1 | 0 | 1.155491   | 4.974324  | -1.492046 |
| 81 | 1 | 0 | -1.179670  | 6.332072  | -0.001337 |
| 82 | 1 | 0 | 0.262589   | 7.155028  | -0.574403 |
| 83 | 1 | 0 | -0.730094  | 6.877446  | -3.900246 |
| 84 | 1 | 0 | -2.325768  | -4.441653 | -2.339866 |

---

**Table S7.** The computational method and coordinates of (5*S*,7*S*,9*R*)-**2** for ECD calculation

td(nstates=50) cam-b3lyp/6-31g(d) scrf=(solvent=methanol)

|   |          |          |          |
|---|----------|----------|----------|
| C | -3.12131 | -3.94306 | 2.46963  |
| C | -1.98228 | -4.67227 | 2.18589  |
| C | -1.13148 | -4.23605 | 1.19245  |
| C | -1.38538 | -3.07117 | 0.47117  |
| C | -2.53988 | -2.33371 | 0.75572  |
| C | -3.38961 | -2.79239 | 1.7564   |
| C | -2.90797 | -1.06888 | -0.02544 |
| C | -3.14821 | 0.15166  | 0.91252  |
| C | -4.10287 | -1.37581 | -0.90341 |
| C | -3.76625 | 1.31851  | 0.18816  |
| C | -3.18561 | 2.49307  | 0.01201  |
| C | -0.45425 | -2.68473 | -0.62284 |
| C | -1.87323 | 0.59739  | 1.64066  |
| C | -0.99618 | 1.55114  | 0.80844  |
| C | -1.80612 | 2.79073  | 0.44152  |
| C | 0.27848  | 1.84239  | 1.55672  |
| C | -1.29231 | 4.01454  | 0.46607  |
| C | -1.97434 | 5.30489  | 0.09483  |
| C | 0.8661   | -2.56609 | -0.54903 |
| C | 1.51599  | 1.84463  | 1.08381  |
| C | 1.70195  | -2.69569 | 0.64304  |
| C | 3.03005  | -2.64896 | 0.60387  |
| C | 3.86528  | -2.76453 | 1.79591  |
| C | 5.19548  | -2.74469 | 1.84715  |
| C | 6.12664  | -2.60356 | 0.72668  |
| C | 7.44155  | -2.60455 | 0.88062  |
| C | 8.44057  | -2.46614 | -0.2278  |
| C | 1.9318   | 1.61724  | -0.30009 |
| C | 3.19813  | 1.69227  | -0.69724 |
| C | 3.61441  | 1.47906  | -2.08071 |
| C | 4.85158  | 1.55748  | -2.56606 |
| C | 6.07638  | 1.87508  | -1.82992 |
| C | 7.26641  | 1.93845  | -2.40644 |
| C | 8.5498   | 2.26127  | -1.70309 |
| C | -4.06619 | -1.39292 | -2.21848 |
| C | -5.19382 | -1.75948 | -3.15696 |
| C | -6.54737 | -1.89416 | -2.49764 |
| O | -7.09809 | -2.92793 | -2.318   |
| O | -7.13557 | -0.76935 | -2.11059 |
| C | -2.15342 | 6.26842  | 1.25481  |
| O | -2.10647 | 7.44772  | 1.13399  |
| O | -2.41654 | 5.74153  | 2.43972  |
| H | -3.80111 | -4.26931 | 3.2348   |
| H | -1.76332 | -5.5759  | 2.72384  |
| H | -0.26009 | -4.81578 | 0.95438  |

|   |          |          |          |
|---|----------|----------|----------|
| H | -4.28529 | -2.24735 | 1.98716  |
| H | -2.08598 | -0.81395 | -0.67666 |
| H | -3.8694  | -0.15185 | 1.66285  |
| H | -5.01576 | -1.61843 | -0.38253 |
| H | -4.76938 | 1.18836  | -0.17499 |
| H | -3.7431  | 3.26638  | -0.48056 |
| H | -0.90557 | -2.50906 | -1.5833  |
| H | -1.28668 | -0.26412 | 1.93236  |
| H | -2.15593 | 1.10872  | 2.55599  |
| H | -0.75812 | 1.05669  | -0.12603 |
| H | 0.15005  | 2.0634   | 2.60402  |
| H | -0.26834 | 4.12865  | 0.77143  |
| H | -1.40127 | 5.83467  | -0.6537  |
| H | -2.96534 | 5.1517   | -0.31149 |
| H | 1.3917   | -2.32705 | -1.45829 |
| H | 2.31462  | 2.0571   | 1.77519  |
| H | 1.20885  | -2.82143 | 1.59014  |
| H | 3.51661  | -2.52184 | -0.34701 |
| H | 3.3326   | -2.87971 | 2.72462  |
| H | 5.65415  | -2.84446 | 2.81655  |
| H | 5.71836  | -2.49552 | -0.26289 |
| H | 7.84932  | -2.71302 | 1.87375  |
| H | 7.95486  | -2.36133 | -1.19024 |
| H | 9.07337  | -1.59873 | -0.06571 |
| H | 9.09305  | -3.33343 | -0.2643  |
| H | 1.17224  | 1.39231  | -1.02775 |
| H | 3.9558   | 1.92247  | 0.03078  |
| H | 2.82345  | 1.2363   | -2.77007 |
| H | 4.98274  | 1.37123  | -3.61877 |
| H | 5.99918  | 2.06614  | -0.77387 |
| H | 7.34275  | 1.74729  | -3.46571 |
| H | 9.00945  | 3.14592  | -2.13364 |
| H | 8.39054  | 2.43737  | -0.64624 |
| H | 9.26095  | 1.44805  | -1.81285 |
| H | -3.14666 | -1.15389 | -2.72544 |
| H | -5.26506 | -1.00999 | -3.93888 |
| H | -4.97545 | -2.70279 | -3.63879 |
| H | -6.62145 | -0.00014 | -2.30616 |
| H | -2.393   | 4.79451  | 2.41952  |

Standard orientation:

| Center<br>Number | Atomic<br>Number | Atomic<br>Type | Coordinates (Angstroms) |           |           |
|------------------|------------------|----------------|-------------------------|-----------|-----------|
|                  |                  |                | X                       | Y         | Z         |
| 1                | 6                | 0              | 3.121311                | -3.943062 | -2.469626 |
| 2                | 6                | 0              | 1.982280                | -4.672265 | -2.185891 |

|    |   |   |           |           |           |
|----|---|---|-----------|-----------|-----------|
| 3  | 6 | 0 | 1.131483  | -4.236052 | -1.192451 |
| 4  | 6 | 0 | 1.385379  | -3.071174 | -0.471168 |
| 5  | 6 | 0 | 2.539879  | -2.333712 | -0.755718 |
| 6  | 6 | 0 | 3.389605  | -2.792391 | -1.756403 |
| 7  | 6 | 0 | 2.907966  | -1.068882 | 0.025444  |
| 8  | 6 | 0 | 3.148212  | 0.151658  | -0.912519 |
| 9  | 6 | 0 | 4.102871  | -1.375814 | 0.903406  |
| 10 | 6 | 0 | 3.766254  | 1.318513  | -0.188161 |
| 11 | 6 | 0 | 3.185609  | 2.493070  | -0.012008 |
| 12 | 6 | 0 | 0.454248  | -2.684730 | 0.622843  |
| 13 | 6 | 0 | 1.873230  | 0.597386  | -1.640664 |
| 14 | 6 | 0 | 0.996183  | 1.551135  | -0.808438 |
| 15 | 6 | 0 | 1.806123  | 2.790729  | -0.441521 |
| 16 | 6 | 0 | -0.278481 | 1.842391  | -1.556715 |
| 17 | 6 | 0 | 1.292307  | 4.014535  | -0.466070 |
| 18 | 6 | 0 | 1.974337  | 5.304891  | -0.094825 |
| 19 | 6 | 0 | -0.866099 | -2.566091 | 0.549034  |
| 20 | 6 | 0 | -1.515991 | 1.844629  | -1.083812 |
| 21 | 6 | 0 | -1.701946 | -2.695692 | -0.643039 |
| 22 | 6 | 0 | -3.030050 | -2.648964 | -0.603872 |
| 23 | 6 | 0 | -3.865276 | -2.764526 | -1.795907 |
| 24 | 6 | 0 | -5.195480 | -2.744690 | -1.847147 |
| 25 | 6 | 0 | -6.126643 | -2.603561 | -0.726683 |
| 26 | 6 | 0 | -7.441550 | -2.604552 | -0.880615 |
| 27 | 6 | 0 | -8.440572 | -2.466139 | 0.227802  |
| 28 | 6 | 0 | -1.931800 | 1.617244  | 0.300093  |
| 29 | 6 | 0 | -3.198126 | 1.692266  | 0.697243  |
| 30 | 6 | 0 | -3.614409 | 1.479059  | 2.080711  |
| 31 | 6 | 0 | -4.851580 | 1.557475  | 2.566057  |
| 32 | 6 | 0 | -6.076378 | 1.875076  | 1.829915  |
| 33 | 6 | 0 | -7.266412 | 1.938448  | 2.406436  |
| 34 | 6 | 0 | -8.549801 | 2.261267  | 1.703085  |
| 35 | 6 | 0 | 4.066192  | -1.392915 | 2.218482  |
| 36 | 6 | 0 | 5.193824  | -1.759478 | 3.156956  |
| 37 | 6 | 0 | 6.547372  | -1.894155 | 2.497638  |
| 38 | 8 | 0 | 7.098091  | -2.927928 | 2.318000  |
| 39 | 8 | 0 | 7.135569  | -0.769349 | 2.110591  |
| 40 | 6 | 0 | 2.153425  | 6.268418  | -1.254814 |
| 41 | 8 | 0 | 2.106465  | 7.447718  | -1.133990 |
| 42 | 8 | 0 | 2.416544  | 5.741527  | -2.439719 |
| 43 | 1 | 0 | 3.801108  | -4.269307 | -3.234803 |
| 44 | 1 | 0 | 1.763315  | -5.575900 | -2.723842 |
| 45 | 1 | 0 | 0.260087  | -4.815784 | -0.954383 |
| 46 | 1 | 0 | 4.285294  | -2.247346 | -1.987157 |
| 47 | 1 | 0 | 2.085985  | -0.813950 | 0.676658  |
| 48 | 1 | 0 | 3.869400  | -0.151853 | -1.662850 |
| 49 | 1 | 0 | 5.015760  | -1.618431 | 0.382534  |
| 50 | 1 | 0 | 4.769375  | 1.188356  | 0.174992  |



|    |   |   |           |           |           |      |
|----|---|---|-----------|-----------|-----------|------|
| 51 | 1 | 0 | 3.743095  | 3.266380  | 0.480562  |      |
| 52 | 1 | 0 | 0.905574  | -2.509056 | 1.583301  |      |
| 53 | 1 | 0 | 1.286680  | -0.264116 | -1.932356 |      |
| 54 | 1 | 0 | 2.155929  | 1.108725  | -2.555994 |      |
| 55 | 1 | 0 | 0.758123  | 1.056689  | 0.126032  |      |
| 56 | 1 | 0 | -0.150046 | 2.063402  | -2.604021 |      |
| 57 | 1 | 0 | 0.268341  | 4.128650  | -0.771429 |      |
| 58 | 1 | 0 | 1.401274  | 5.834670  | 0.653698  |      |
| 59 | 1 | 0 | 2.965340  | 5.151695  | 0.311490  |      |
| 60 | 1 | 0 | -1.391697 | -2.327050 | 1.458285  |      |
| 61 | 1 | 0 | -2.314623 | 2.057104  | -1.775193 |      |
| 62 | 1 | 0 | -1.208852 | -2.821433 | -1.590136 |      |
| 63 | 1 | 0 | -3.516614 | -2.521839 | 0.347010  |      |
| 64 | 1 | 0 | -3.332596 | -2.879705 | -2.724621 |      |
| 65 | 1 | 0 | -5.654151 | -2.844464 | -2.816552 |      |
| 66 | 1 | 0 | -5.718356 | -2.495515 | 0.262890  |      |
| 67 | 1 | 0 | -7.849319 | -2.713022 | -1.873754 |      |
| 68 | 1 | 0 | -7.954861 | -2.361325 | 1.190245  |      |
| 69 | 1 | 0 | -9.073365 | -1.598725 | 0.065710  |      |
| 70 | 1 | 0 | -9.093051 | -3.333431 | 0.264301  |      |
| 71 | 1 | 0 | -1.172238 | 1.392311  | 1.027749  |      |
| 72 | 1 | 0 | -3.955802 | 1.922473  | -0.030784 |      |
| 73 | 1 | 0 | -2.823452 | 1.236295  | 2.770073  |      |
| 74 | 1 | 0 | -4.982740 | 1.371229  | 3.618767  |      |
| 75 | 1 | 0 | -5.999178 | 2.066137  | 0.773865  |      |
| 76 | 1 | 0 | -7.342750 | 1.747285  | 3.465709  |      |
| 77 | 1 | 0 | -9.009453 | 3.145920  | 2.133636  |      |
| 78 | 1 | 0 | -8.390539 | 2.437369  | 0.646236  |      |
| 79 | 1 | 0 | -9.260951 | 1.448050  | 1.812852  |      |
| 80 | 1 | 0 | 3.146658  | -1.153894 | 2.725441  |      |
| 81 | 1 | 0 | 5.265058  | -1.009990 | 3.938882  |      |
| 82 | 1 | 0 | 4.975449  | -2.702788 | 3.638793  |      |
| 83 | 1 | 0 | 6.621451  | -0.000136 | 2.306157  |      |
| 84 | 1 | 0 | 2.392999  | 4.794505  | -2.419520 | ---- |

---

## References

1. Che, Q.; Zhu, T.; Qi, X.; Mándi, A.; Kurtán, T.; Mo, X.; Li, D. Hybrid Isoprenoids from a Reeds Rhizosphere Soil Derived Actinomycete *Streptomyces* sp. CHQ-64. *Org. Lett.* **2012**, *14*, 3438-3441.
2. Yao, T.; Liu, J.; Liu, Z.; Li, T.; Li, H.; Che, Q.; Zhu, T.; Li, D.; Li, W. Genome mining of cyclodipeptide synthases unravels unusual tRNA-dependent diketopiperazine-terpene biosynthetic machinery. *Nat. Commun.* **2018**, *9*, 4091
3. Li, H.; Liu, J.; Deng, Z.; Li, T.; Liu, Z.; Che, Q.; Li, W. Genetic Manipulation of an Aminotransferase Family Gene *dtlA* Activates Youssoufenes in Marine-Derived *Streptomyces youssoufiensis*. *Org. Lett.* **2020**, *17*, 729-733.
